1 **Coherent feedforward regulation of gene expression by *Caulobacter*  $\sigma^T$  and GsrN during**  
2 **hyperosmotic stress**

3

4

5 Matthew Z. Tien, Benjamin J. Stein, Sean Crosson\*

6

7

8 Department of Biochemistry and Molecular Biology, University of Chicago, Chicago, IL 60637. USA.

9

10

11 \* Corresponding Author

12 E-mail: [scrosson@uchicago.edu](mailto:scrosson@uchicago.edu)

13

14 **Running title:** *Caulobacter* regulatory response to hyperosmotic stress

15

16

## 17 **Abstract**

18 GsrN is a conserved small RNA that is under the transcriptional control of the general stress response  
19 (GSR) sigma factor,  $\sigma^T$ , and functions as a major post-transcriptional regulator of *Caulobacter*  
20 *crescentus* survival across multiple stress conditions. We have conducted molecular genetic studies  
21 aimed at defining features of GsrN structure that determine cell survival under hyperosmotic stress,  
22 and have applied biochemical, transcriptomic and proteomic methods to define molecular regulatory  
23 targets of GsrN under hyperosmotic conditions. The 5' end of GsrN, which includes a conserved  
24 cytosine-rich stem loop structure, is necessary for cell survival upon osmotic upshock. GsrN both  
25 activates and represses gene expression when cells encounter a hyperosmotic environment. Among  
26 the genes most highly activated by GsrN is an uncharacterized open reading frame we have named  
27 *osrP*, which is predicted to encode a 37 kDa glycine-zipper protein. We present evidence that GsrN  
28 physically interacts with *osrP* mRNA through its 5' C-rich stem loop to enhance OsrP protein  
29 expression. Given that  $\sigma^T$  directly activates *gsrN* and *osrP* transcription, and that GsrN post-  
30 transcriptionally activates OsrP protein expression, we conclude that *sigT*, *gsrN*, and *osrP* comprise a  
31 coherent feedforward loop. This study delineates transcriptional and post-transcriptional layers of  
32 *Caulobacter* gene expression control during hyperosmotic stress, uncovers a new regulatory target of  
33 GsrN, and defines a coherent feedforward motif within the *Caulobacter* GSR regulatory network.

34

## 35 **Importance**

36 Bacteria inhabit diverse niches, and must adapt their physiology to constant environmental  
37 fluctuations. A major response to environmental perturbation is to change gene expression.  
38 *Caulobacter* and other alphaproteobacteria initiate a complex gene expression program known as the  
39 general stress response (GSR) under conditions including oxidative stress, osmotic stress, and  
40 nutrient limitation. The GSR enables cell survival in these environments. Understanding how bacteria  
41 survive stress requires that we dissect gene expression responses, such as the GSR, at the  
42 molecular level. This study is significant as it defines transcriptional and post-transcriptional layers of

43 gene expression regulation in response to hyperosmotic stress. We further provide evidence that  
44 coherent feedforward motifs influence the system properties of the *Caulobacter* GSR pathway.  
45

## 46 Introduction

47 Cells alter gene expression to adapt to environmental perturbations. In bacteria, two major  
48 mechanisms controlling transcription are two-component signaling (TCS) (1) and alternative sigma ( $\sigma$ )  
49 factor regulation (2, 3). In species of the class Alphaproteobacteria, crosstalk between these  
50 mechanisms is uniquely achieved via the protein, PhyR, which contains both a  $\sigma$ -like domain and a  
51 TCS receiver domain (4-7). Under a range of specific stress conditions, PhyR becomes  
52 phosphorylated and, through a protein partner switching mechanism (5), activates a gene expression  
53 program known as the general stress response (GSR). The GSR is required for survival under diverse  
54 environmental conditions (8, 9).

55

56 We recently developed a network-based algorithm (10) to interrogate publicly available gene  
57 expression datasets to predict genes functioning in stress survival in the alphaproteobacterium,  
58 *Caulobacter crescentus*. This led to the discovery of a conserved small RNA (sRNA), GsrN, that plays  
59 an important role in survival across distinct environmental conditions including hyperosmotic and  
60 oxidative stress (11). GsrN is directly activated by the GSR alternative sigma factor,  $\sigma^T$ , and imposes  
61 a post-transcriptional layer of gene expression regulation during the general stress response. In the  
62 case of hydrogen peroxide stress, GsrN protects cells by base pairing with the 5' leader sequence of  
63 *katG* mRNA to promote expression of KatG catalase/peroxidase protein (11). To date, the identity of  
64 genes regulated by GsrN under hyperosmotic stress conditions remain undefined. The goal of this  
65 study was to define structural features of *Caulobacter* GsrN that are required for hyperosmotic stress  
66 survival and to identify direct molecular targets of GsrN under hyperosmotic conditions.

67

68 The induction of sRNA expression by osmotic stress has been described in a handful of bacterial  
69 species (12-15). Examples of sRNAs with known roles in osmoregulation of gene expression include  
70 OmrA/OmrB (16), MicF (12), and MicC (17) in *Escherichia coli*. The OmrA/OmrB system is  
71 upregulated during osmotic stress by the two-component system, EnvZ-OmpR. OmrA/OmrB function  
72 as post-transcriptional feedback repressors of OmpR (18) and repress the expression of outer

73 membrane proteins, including TonB-dependent receptors (16). MicF and MicC are also induced by  
74 changes in osmolarity and function to repress translation of outer membrane proteins OmpF and  
75 OmpC, respectively (12, 17). Though expression of these sRNAs are induced by shifts in the osmotic  
76 state of the environment, data demonstrating a role for OmrA/OmrB, MicC, and MicF in cell survival  
77 under acute osmotic stress have not been reported to our knowledge.

78

79 We have assayed osmotic stress survival of a series of *gsrN* mutant strains, used transcriptomic and  
80 proteomic methods to more clearly define the role of GsrN in gene expression during hyperosmotic  
81 stress, and provided evidence for a new direct regulatory target of GsrN. Features of GsrN structure  
82 that are functionally important for hyperosmotic stress survival are contained in the 5' end of the  
83 molecule, and include a conserved cytosine-rich stem loop structure. Transcriptomic and proteomic  
84 analyses identified genes that are both activated and repressed by GsrN upon shift to a hyperosmotic  
85 environment. Among the regulated gene set was a hypothetical protein we have named OsrP, which  
86 contains a glycine zipper domain resembling the glycine zipper motifs of large- and small-  
87 conductance mechanosensitive channels (19). We present evidence that GsrN directly interacts with  
88 *osrP* mRNA and activates OsrP protein expression at the post-transcriptional level to form a coherent  
89 feedforward regulatory loop. This study advances understanding of *Caulobacter crescentus* gene  
90 expression during hyperosmotic stress and defines a new post-transcriptional regulatory target of  
91 GsrN.

92

## 93 **Results**

### 94 **A 5' cytosine-rich loop in GsrN is necessary for osmotic stress survival**

95 GsrN is a small RNA (sRNA) that undergoes endonucleolytic processing, and functions as a  
96 potent regulator of both oxidative stress and osmotic stress survival in *Caulobacter crescentus* (11).  
97 Expression of the processed 5' fragment of GsrN is necessary and sufficient to protect cells from  
98 hydrogen peroxide exposure. This protection requires interaction of GsrN with the mRNA of  
99 catalase/peroxidase *katG* through a C-rich loop located in the stable 5' half of GsrN (11). To assess

100 the functional role of GsrN processing and the 5' C-rich loop under a distinct stress condition, we  
101 assayed osmotic stress survival of strains harboring truncated and C-loop mutant variants of GsrN.

102 For these assays, we generated: *i*) a GsrN deletion strain ( $\Delta gsrN$ ), and *ii*) a strain lacking the 5'  
103 end of GsrN,  $gsrN(\Delta 5')$  (by deleting *gsrN* nucleotides 10-50) (**Fig. 1A**). Both  $\Delta gsrN$  and  $gsrN(\Delta 5')$  had  
104  $\approx 1$  order of magnitude reduced viability during sucrose-induced osmotic stress when compared to  
105 wild-type *Caulobacter* strain CB15 (**Fig. 1B**). Ectopic expression of the first 58 nucleotides of *gsrN* in  
106 single copy from its native promoter ( $gsrN(\Delta 3')$ ) complemented the survival defect of  $\Delta gsrN$ . Notably,  
107 a  $\Delta gsrN$  strain harboring multiple integrations of this complementation plasmid,  $\Delta gsrN::gsrN(\Delta 3')^{++}$ ,  
108 had increased viability under hyperosmotic stress compared to wild type (**Fig. 1B**). This protective  
109 effect is consistent with peroxide stress protection conferred by full-length *gsrN* overexpression  
110 ( $gsrN^{++}$ ), reported in our previous study (11).

111 Given that expression of the 5' end of GsrN complemented the hyperosmotic stress survival  
112 defect of  $\Delta gsrN$ , we hypothesized that the 5' C-rich loop functions to mitigate osmotic stress in  
113 addition to its previously reported function in peroxide stress mitigation. Overexpression of a GsrN  
114 mutant variant in which the 5' cytosine tract was replaced with guanines,  $gsrN(RS)$ , failed to restore  
115 osmotic stress survival to wild-type levels in the  $\Delta gsrN$  strain (**Fig. 1C**). We thus propose that the 5' C-  
116 loop of GsrN is necessary to target mRNAs that are involved in osmotic stress survival.

117

### 118 ***gsrN*-dependent osmotic stress protection requires *sigT***

119 *gsrN* expression is directly activated by the general stress sigma factor, SigT ( $\sigma^T$ ). As described above,  
120 strains lacking *sigT* (6, 20) or *gsrN* (11) are susceptible to osmotic stress. We thus tested whether  
121 expression of *gsrN* is sufficient to rescue the osmotic stress survival defect of the  $\Delta sigT$  strain, as  
122 previously reported for hydrogen peroxide stress (11). We constructed a  $\Delta sigT$  strain in which *gsrN*  
123 transcription was driven by the primary sigma factor RpoD ( $\sigma^{70}$ ). We call this expression system P1-  
124 *gsrN* (**Fig. 2A**). GsrN expressed from P1 had comparable steady-state levels as GsrN expressed from  
125 its native  $\sigma^T$ -dependent promoter (**Fig. 2B**), but did not rescue the hyperosmotic stress survival defect  
126 of  $\Delta sigT$  (**Fig. 2C**). Unlike acute peroxide stress, osmotic stress induces the transcription of *gsrN* by a

127 factor of three (11). To better emulate GsrN expression during osmotic stress, we further created a  
128 strain bearing three copies of P1-*gsrN*. Using this 3(P1-*gsrN*) strain, we matched the enhanced  
129 steady-state levels of GsrN observed during osmotic stress (**Fig. 2B**). However, enhanced expression  
130 of GsrN in  $\Delta sigT+3(P1-gsrN)$  still failed to rescue the hyperosmotic stress survival defect of the  $\Delta sigT$   
131 strain (**Fig. 2C**). We conclude that GsrN-dependent protection during hyperosmotic stress requires  $\sigma^T$ .

132

### 133 **Defining *sigT* and *gsrN* regulated genes under hyperosmotic conditions**

134 We considered two non-mutually exclusive models to explain why GsrN-dependent protection  
135 against hyperosmotic stress requires  $\sigma^T$ : *i*) GsrN functions as a direct post-transcriptional regulator of  
136 mRNAs that are transcribed by  $\sigma^T$ , *ii*) GsrN regulates gene products that are not under the control of  
137  $\sigma^T$ , but that require  $\sigma^T$ -regulated genes to mitigate hyperosmotic stress. Thus, to identify candidate  
138 mRNA targets and begin gathering evidence to support either or both models, we measured gene  
139 expression changes during hyperosmotic stress in a GsrN overexpression strain (*gsrN<sup>++</sup>*), a  $\Delta sigT$   
140 strain, and in wild type *Caulobacter*. Specifically, we measured steady-state transcript levels in  $\Delta sigT$   
141 and wild type strains under stressed and untreated conditions to define the  $\sigma^T$ -dependent osmotic  
142 stress regulon. We further measured transcripts in *gsrN<sup>++</sup>* and wild type under the same conditions to  
143 identify candidate transcripts involved in *gsrN*-dependent hyperosmotic stress protection. Lastly, we  
144 measured proteome changes between treated and untreated *gsrN<sup>++</sup>* and wild-type strains to define  
145 protein expression regulated by GsrN during osmotic stress.

146 Although *sigT*-dependent gene expression has been previously studied in *Caulobacter* (7, 20,  
147 21), a high-resolution expression analysis of GSR mutant strains under hyperosmotic stress has not  
148 been published. Our RNA-seq measurements defined a  $\sigma^T$  regulon comprising 333 genes that are  
149 differentially expressed between  $\Delta sigT$  and wild type under untreated conditions (false-discovery rate  
150 (FDR) *p-value*  $\leq 0.05$ ; absolute fold change  $\geq 1.5$ ). The number of differentially regulated genes during  
151 hyperosmotic stress is greater – 530 genes – using the same cutoff criteria. We defined the core  $\sigma^T$ -  
152 regulon as the intersection of differentially regulated genes in both untreated and treated conditions,  
153 220 genes (**Table S3**). This greatly expands the number of  $\sigma^T$ -regulated genes compared to previous

154 reports by our group (20) and others (21). We further sought to predict genes that may be directly  
155 transcribed by  $\sigma^T$  based on our gene expression data. To this end, we extracted 250 nucleotide  
156 windows upstream of the translation start sites of genes activated by *sigT*. In the case of operons, we  
157 only considered the upstream region of the leading gene. Using a degenerate  $\sigma^T$  search motif based  
158 on variations observed in 20 identified  $\sigma^T$ -binding sites in past studies (**Fig. S2**) (7, 20, 21), we  
159 identified 32 new  $\sigma^T$ -binding sites in the *Caulobacter* genome (**see Table S1**).

160 A parallel RNA-Seq experiment identified 35 genes that are differentially expressed in *gsrN*<sup>++</sup>  
161 relative to wild type in untreated conditions and 141 genes under hyperosmotic conditions (false-  
162 discovery rate (FDR) *p-value*  $\leq 0.05$ ; absolute fold change  $\geq 2.0$ ) (**see Table S4**). Considering that  
163 differences in GsrN-regulated transcripts do not necessarily correspond to differences in protein levels  
164 (11), and that GsrN is known to regulate gene expression at the post-transcriptional level, we further  
165 performed a LC-MS/MS analysis of total soluble protein isolated from *gsrN*<sup>++</sup> and wild type strains  
166 under untreated and hyperosmotic conditions. Twenty-two proteins showed significant differences in  
167 steady-state levels between *gsrN*<sup>++</sup> and wild type under untreated conditions (false-discovery rate  
168 (FDR) *p-value*  $\leq 0.05$ ; absolute fold change  $\geq 2.0$ ). None of these proteins showed significant transcript  
169 level differences under the same criteria, though, they all showed significant negative fold change  
170 differences in protein abundance (**Table 1**). This suggests that the predominant role for *gsrN* in  
171 exponentially-growing cells might be as a repressor. Protein measurements under hyperosmotic  
172 stress revealed nine proteins that had significant differences in steady-state levels between *gsrN*<sup>++</sup>  
173 and wild type (**Table 2**). Four of these proteins had corresponding significant differences in transcript  
174 levels; one protein had an inverse relationship with its transcript levels (**Fig. 3**). This analysis identified  
175 proteins whose expression is activated by GsrN and proteins whose expression is repressed by GsrN  
176 under hyperosmotic stress.

177

### 178 **Comparative RNA-seq analysis uncovers candidate targets of GsrN under hyperosmotic stress**

179 To delineate the roles of *sigT* and *gsrN* in stress survival, we compared genes that are  
180 differentially regulated between  $\Delta sigT$ , *gsrN*<sup>++</sup> and wild type strains subjected to hyperosmotic stress.



181 More explicitly, we sought to test the model that GsrN functions as a direct post-transcriptional  
182 regulator of mRNAs that are dependent on  $\sigma^T$ -transcription. Since transcription of *gsrN* is directly  
183 activated by  $\sigma^T$ , we expected (in this model) that the set of transcripts modulated by *gsrN*  
184 overexpression should exhibit some overlap with the set of transcripts that change upon *sigT* deletion.  
185 Indeed, we observed 20 genes with congruent patterns of regulation in these two datasets (**Fig. 4A**  
186 **and Table 3**).

187 Through this comparative approach, we identified six candidate genes that were possibly  
188 targeted and upregulated by GsrN. Transcript levels for these genes were significantly lower than wild  
189 type in  $\Delta sigT$  and higher in *gsrN<sup>++</sup>* under hyperosmotic stress (**Fig. 4B**). We predicted strong  $\sigma^T$ -  
190 binding sites in the promoters of five of these candidates: *CCNA\_00882*, *CCNA\_00709*, *CCNA\_03889*,  
191 and *CCNA\_03694-CCNA\_03595* (**Table S1**). Of these possible direct regulatory targets of GsrN,  
192 *CCNA\_00882* showed the highest fold change ( $\approx 7$  fold) between *gsrN<sup>++</sup>* and wild type strains  
193 subjected to hyperosmotic stress (**Fig. 4B**). Moreover, *CCNA\_00882* is strongly upregulated during  
194 osmotic stress: in a wild type background, *CCNA\_00882* mRNA levels were upregulated  $\approx 6$  fold in  
195 stressed versus unstressed cultures. In GsrN overexpression strains (*gsrN<sup>++</sup>*), *CCNA\_00882* mRNA  
196 was further enhanced ( $\approx 12.5$  fold) in stressed relative to unstressed cultures. Thus, we named  
197 *CCNA\_00882*, *osrP*, *osmotic stress regulated protein*. We note that *osrP* mRNA was previously  
198 identified as a species that co-elutes with GsrN in an affinity pull-down experiment (11). Considering  
199 the presence of a  $\sigma^T$  binding motif in the *osrP* promoter, its regulation by GsrN in our transcriptomic  
200 datasets, and the fact that it co-purifies with GsrN, we proposed that *osrP* is a direct target of GsrN.

201

202 ***osrP* is regulated by  $\sigma^T$ , induced under hyperosmotic stress, and interacts with GsrN via its 5'**  
203 **leader sequence**

204 *osrP* is annotated as a 332-residue hypothetical protein that is largely restricted to the genus  
205 *Caulobacter*, based on a BLAST search (22) of the GenBank non-redundant database. However, the  
206 primary structure of *osrP* shares some features with annotated open reading frames across genera in  
207 the family Caulobacteraceae including *Phenylobacterium*, *Asticcacaulis*, and *Brevundimonas*. OsrP

208 contains a signal peptide at its amino terminus with a Type I signal peptidase cleavage site, as  
209 predicted by SignalP (23). A conserved glycine zipper motif (Pfam05433) comprised of two  
210 hydrophobic helices is located between residues 224 and 268. Based on these sequence features, we  
211 predict that OsrP is a periplasmic protein (**Fig. S3**).

212 To better understand the regulation of *osrP* by  $\sigma^T$  and GsrN, we identified its transcription start  
213 site (TSS) by 5' rapid amplification of cDNA ends (5' RACE). We mapped the *osrP* TSS to nucleotide  
214 962935 on the *C. crescentus* chromosome; a near-consensus  $\sigma^T$  binding site is positioned at -35 and -  
215 10 relative to the *osrP* TSS (**Fig. 5A and Table S1**). To assess transcriptional regulation of *osrP*, we  
216 generated a fusion of the *osrP* promoter to a promoterless *lacZ* (**Fig. 5B**). Measured  $\beta$ -galactosidase  
217 activities in wild type and  $\Delta$ *gsrN* strains harboring this reporter plasmid were comparable under  
218 untreated conditions, and transcription was activated in both of these genetic backgrounds upon  
219 addition of 150 mM sucrose to induce hyperosmotic stress. A  $\Delta$ *sigT* strain harboring this plasmid had  
220 no measureable  $\beta$ -galactosidase activity, and was not induced upon addition of 150 mM sucrose (**Fig.**  
221 **5B**). We conclude that transcription of *osrP* depends on *sigT* and is independent of *gsrN*.

222 We previously affinity purified GsrN tagged with a PP7 RNA hairpin aptamer (GsrN(37)-  
223 PP7hp) from *Caulobacter* cell lysate, and quantified RNAs that co-purified with GsrN by RNA-seq (11).  
224 For this present study, we have re-analyzed our published dataset (NCBI GEO accession number  
225 GSE106171) with the goal of identifying reads that map to *osrP* mRNA. We observed significant  
226 enrichment of reads that map to the extended 5' leader sequence of *osrP*, which is comprised of  
227 approximately 80 nucleotides between the TSS and the annotated start codon. Read density from  
228 PP7hp-GsrN(term) (negative PP7 hairpin control) showed no enrichment of the 5' leader of *osrP* (**Fig.**  
229 **5C**). IntaRNA analysis (24) of this co-purifying region predicted strong base-pairing between the 5' C-  
230 rich loop of GsrN and the 5' leader of *osrP* (**Fig. 5A**). From these data, we conclude that GsrN  
231 interacts with the 5' untranslated leader of *osrP* mRNA.

232

233 **GsrN activates OsrP expression at the post-transcriptional level**

234 To test the functional significance of the proposed GsrN binding site in the 5' leader of *osrP*  
235 mRNA, we constructed an *osrP* transcriptional-translational (TT) reporter plasmid. The reporter  
236 contains the *osrP* promoter, the 5' untranslated region (5' UTR), and the first 7 codons of *osrP* fused  
237 to 5' end of *lacZ* lacking a start codon (**Fig. 6A**). The RNA-fold (25) structure of the 5' UTR and the  
238 nucleotides encoding the first 7 amino acids of *osrP* predicts that the majority of the GsrN-binding site  
239 is sequestered in a base-paired region (26) (**Fig. 6B**). Under unstressed conditions, measured activity  
240 from the TT reporter is low in wild type background, but reduced by 2 fold in  $\Delta sigT$  and  $\Delta gsrN$   
241 backgrounds. Overexpression of *gsrN* (*gsrN<sup>++</sup>*) enhances expression by 8 fold compared to wild type.  
242 This enhancement of *osrP* expression requires *sigT*, as overexpression of *gsrN* from the  $\sigma^{70}$  P1  
243 promoter in a  $\Delta sigT$  background does not induce expression from the *osrP* TT reporter (**Fig. 6C**). This  
244 result is consistent with data presented in **Fig. 5B** showing the *osrP* transcription requires  $\sigma^T$  and  
245 supports a model in which GsrN regulates OsrP protein expression at the post-transcriptional level.  
246 Lastly, our measurements of *osrP* TT reporter activity under hyperosmotic stress conditions showed  
247 similar relative regulatory trends across the assayed genetic backgrounds, though baseline  
248 expression is higher (**Fig. 6C**).

249 To directly validate the OsrP expression reporter data, we inserted a C-terminal FLAG tag at  
250 the native *osrP* locus on the *Caulobacter* chromosome. OsrP::M2 is expressed at low levels in  
251 exponentially growing wild type cultures, and was difficult to detect by Western blot. However, we  
252 observed increased steady-state levels of OsrP::M2 in exponential phase cultures of the *gsrN<sup>++</sup>* strain  
253 (**Fig. 6D**). To assess the effects of hyperosmotic stress of *gsrN* on OsrP expression, we added 150  
254 mM sucrose to cultures of wild type,  $\Delta gsrN$ , and *gsrN<sup>++</sup>*. Hyperosmotic stress induced the production  
255 of OsrP::M2 in wild type and this effect largely required *gsrN*; there was no detectable OsrP::M2  
256 signal in  $\Delta gsrN$ . Consistent with our *osrP* reporter data, we observed a large increase in OsrP::M2  
257 levels in *gsrN<sup>++</sup>* relative to wild type during hyperosmotic stress (**Fig. 6D**). Again, these data support a  
258 model in which GsrN activates OsrP protein expression at the post-transcriptional level.

259

260 **Assessing the role of the GsrN C-rich recognition loop in activation of OsrP expression**

261 It is established that the C-rich target recognition loop is a functionally-important feature of  
262 GsrN structure that directly activates KatG catalase/peroxidase expression through a base-pairing  
263 interaction with the 5' leader of *katG* mRNA (11). To test the role of the GsrN recognition loop in the  
264 activation of OsrP protein expression, we constructed a TT *osrP* reporter containing RS mutations in  
265 the 5' leader of *osrP* (*osrP*-RS1), which are predicted to restore G-C base pairing with the GsrN(RS)  
266 recognition loop mutant (see **Fig. S4**).

267 The *osrP*-RS1 reporter showed no difference in activity between wild type and  $\Delta$ *gsrN* in  
268 untreated conditions, though basal expression from this reporter was higher than the wild-type *osrP*  
269 TT reporter. Expression from the *osrP*-RS1 reporter was equivalently induced in hyperosmotic  
270 conditions in wild type and  $\Delta$ *gsrN* backgrounds; *osrP*-RS1 reporter activity was modestly induced (2-  
271 fold) in *gsrN*<sup>++</sup> relative to wild type (**Fig. S4B**). However, the magnitude of induction was considerably  
272 diminished relative to the 8-fold induction we observed from the wild-type *osrP* TT reporter upon *gsrN*  
273 overexpression (**Fig. 6C**). We did not observe significant differences in *osrP*-RS1 reporter activity  
274 under hyperosmotic stress in wild type,  $\Delta$ *gsrN*, and *gsrN*<sup>++</sup> strains. We further introduced the *osrP*-  
275 RS1 reporter into the *gsrN*(RS) mutant strain. Again, we observed elevated expression from the *osrP*-  
276 RS1 reporter relative to the wild type *osrP* TT reporter in both wild type and *gsrN*(RS) backgrounds  
277 (**Fig. S4C**). These experiments therefore failed to uncover direct evidence for base pairing interaction  
278 between the GsrN recognition loop and the predicted target site in the 5' leader of *osrP*.

279 However, we noted that the 5' leader mutations in *osrP*-RS1 would disrupt the predicted  
280 secondary structure of the *osrP* leader (**see Fig. S4A**), which may influence GsrN-dependent  
281 regulation. To compensate for base pairing disruptions introduced in *osrP*-RS1, we generated  
282 compensatory base changes on the opposing arm of the RNA stem that would be predicted to restore  
283 leader secondary structure; we termed this the *osrP*-RS2 reporter (**Fig. S4D**). We failed to detect any  
284 reporter activity from *osrP*-RS2 in any strain, including strains expressing *gsrN*(RS) (**see Fig. S4E-F**).  
285 Based on these reporter data, we conclude that mutation of the predicted GsrN target site in the 5'  
286 leader of *osrP* derepresses expression of OsrP protein. From this set of experiments, we are not able

287 to definitively conclude that there is a base pairing regulatory interaction between the GsrN C-rich  
288 recognition loop and the 5' leader of *osrP* mRNA that activates OsrP expression.

289

### 290 ***osrP* is not major genetic determinant of hyperosmotic stress survival**

291 Given that *osrP* expression is under strong positive control of  $\sigma^T$  and GsrN during  
292 hyperosmotic stress, we tested the possibility that *osrP* contributes to stress survival. Deletion of *osrP*  
293 ( $\Delta osrP$ ) did not affect the viability of *C. crescentus* under hyperosmotic conditions when compared to  
294 wild type and  $\Delta gsrN$  strains (**Fig. S1D**). We also expressed *osrP* from a xylose-inducible expression  
295 plasmid that we integrated into the chromosomal *xylX* locus, (*osrP<sup>++</sup>*). Similar to  $\Delta osrP$ , the viability of  
296 the *osrP<sup>++</sup>* strain in the presence of inducer did not differ significantly from wild type (**Fig. S1D**).  
297 We further tested the effects of deletion and overexpression of *osrP* on osmotic stress survival in  
298  $\Delta gsrN$  and *gsrN<sup>++</sup>* backgrounds.  $\Delta gsrN$  *osrP<sup>++</sup>* viability did not differ significantly from  $\Delta gsrN$  and  
299  $\Delta osrP$  *gsrN<sup>++</sup>* did not differ significantly from *gsrN<sup>++</sup>* (**Fig. S1D**). From these data, we conclude that  
300 *osrP* is not a major contributor to hyperosmotic stress survival under the assayed conditions.

301

### 302 **Discussion**

303 Microbes employ regulatory systems that function to mitigate the effects of osmotic stress (27).  
304 During hyperosmotic stress, the freshwater oligotroph *Caulobacter crescentus* activates the general  
305 stress response (GSR) sigma factor,  $\sigma^T$ , which in turn activates transcription of a large set of genes  
306 (**Table S3**) including the sRNA, GsrN (11, 21). Deleting either *sigT* or *gsrN* results in reduced viability  
307 under sucrose-induced hyperosmotic stress (**Fig. 1C** and **Fig. 2C**). *gsrN*-dependent cell protection  
308 during hyperosmotic stress requires *sigT* (**Fig. 2C**).

309 Transcriptomic analysis of a  $\Delta sigT$  strain provided a comprehensive view of the  $\sigma^T$   
310 hyperosmotic stress regulon, while transcriptomic and proteomic analysis of a *gsrN* overexpression  
311 strain (*gsrN<sup>++</sup>*) revealed a set of transcripts and proteins that are under post-transcriptional control of  
312 GsrN during hyperosmotic stress (**Fig. 3** and **Table 2**). Comparative analyses of these datasets  
313 provided evidence for multi-output feedforward loops (FFL) involving  $\sigma^T$  and GsrN. One such coherent

314 FFL involves the uncharacterized glycine-zipper protein, OsrP. Specifically, transcription of *osrP* is  
315 activated by  $\sigma^T$  (**Fig. 5B**), likely via the canonical  $\sigma^T$  binding site in its promoter (**Fig. 5A and Table**  
316 **S3**). OsrP protein expression is activated at the post-transcriptional level by GsrN (**Fig. 6C-D**), to form  
317 a coherent FFL. Both *sigT* and *gsrN* are required for OsrP protein expression; thus, both regulators  
318 comprise an AND gate that regulates *osrP*.

319

## 320 **A coherent feedforward loop controls a *Caulobacter* gene expression response during** 321 **hyperosmotic stress**

322 Feedforward loops (FFL) are common regulatory motifs in microbial gene expression networks.  
323 In their simplest form, FFLs are comprised of three genetic components: two regulators and an output  
324 gene. The primary regulator functions to activate both the secondary regulator and the output gene;  
325 the secondary regulator functions to activate expression of the output gene (28). In the case of *osrP*,  
326  $\sigma^T$  is the primary regulator that activates *osrP* and *gsrN* transcription; GsrN interacts with *osrP* mRNA  
327 to activate OsrP protein expression at the post-transcriptional level (**Fig. 7**).

328

329 There are several examples of sRNAs that are part of FFL motifs in bacteria (29-31). Activation of  
330 *osrP* expression by  $\sigma^T$  and GsrN is perhaps most similar to the regulation of *ricI*, an inhibitor of  
331 conjugation in *Salmonella*, by  $\sigma^S$  and the sRNA RprA (30). In this instance, the primary and secondary  
332 regulators are swapped: RprA acts as a primary activator of *rpoS* and *ricI* expression. RprA itself is  
333 activated by the Rcs system (32), which responds to envelope stress. However, *rpoS* expression is  
334 determined by multiple environmental signals and does not require *rprA* to transcribe *ricI*. Thus, *ricI*  
335 can be transcribed in the absence of envelope stress, but both RprA and  $\sigma^S$  are required for RicI  
336 protein expression. Thus, RprA and  $\sigma^S$  function as a FFL AND gate that ensures RicI expression only  
337 occurs upon Rcs activation by envelope damage.

338 Unlike *ricI*, the coherent FFL controlling *osrP* is activated by  $\sigma^T$  alone. In wild-type *C.*  
339 *crescentus*, we observe basal  $\sigma^T$ -dependent gene expression in the absence of any apparent stress  
340 (**Fig. 5B and Fig 6C**). During hyperosmotic stress, *osrP* expression measured from the *osrP i*)



341 transcription and *ii*) transcription plus translation (TT) reporters are incongruent: *osrP* transcription  
342 increases 2-fold during hyperosmotic stress while TT reporter activity increases 6-fold within an  
343 equivalent time window. The difference in fold change between the two reporters is likely due to the  
344 positive regulatory effects of GsrN. The increased fold change of the TT reporter can be attributed to  
345 the 3-fold increase of GsrN during hyperosmotic stress (11). In fact, *osrP* TT-reporter activity  
346 increased 6-7 fold upon *gsrN* overexpression in both stressed and unstressed conditions.

347         During persistent stress conditions, such as hyperosmotic stress and stationary phase, we  
348 have observed that the more stable 5' isoform of GsrN accumulates to higher levels than full-length  
349 GsrN (11). Accumulation of the 5' GsrN isoform could act as signal within the *sigT*-regulon to mount a  
350 specific response to persistent stress, such as hyperosmotic shock. This model is consistent with  
351 AND-type coherent FFLs, which result in delayed activation of the output gene. Expression delay  
352 arises from the lag between the production of the secondary regulator and the threshold necessary for  
353 the secondary regulator to act upon the output gene (28). In the case of *osrP*, levels of GsrN may set  
354 the threshold for OsrP protein production. Accumulation of the 5' GsrN isoform through prolonged  $\sigma^T$ -  
355 activity could amplify the expression of *osrP* over other  $\sigma^T$ -regulated genes in particular stress  
356 regimes. Although we conclusively demonstrate only one GSR coherent feedforward loop (during  
357 hyperosmotic stress) in this study, our transcriptomic and proteomic data show that several genes in  
358 the GSR regulon may be subject to similar regulation.

359

### 360 **Functional analysis of the uncharacterized glycine zipper protein, OsrP**

361         Bioinformatic analysis of OsrP predicts two notable features in its sequence: a signal peptide  
362 at its amino terminus with a Type I signal peptidase cleavage site and a conserved glycine zipper  
363 motif (Pfam05433) (**Fig. S3**). From this analysis, we predict that OsrP is in the periplasm of *C.*  
364 *crescentus*. The primary structure of the glycine zipper motif suggests a possible interaction with the  
365 cell membrane. Extended glycine zipper motifs can oligomerize and form pores within membranes  
366 (19). One notable example is the secreted VacA toxin of *H. pylori* that forms a hexameric anion  
367 selective channel in host cells (33).

368 In considering its primary structure, predicted localization, and regulation, it seemed possible  
369 that *osrP* could help alleviate osmotic stress in *C. crescentus*. However, deletion of *osrP* did not result  
370 in any obvious viability defect during sucrose-induced hyperosmotic stress. Considering there are  
371 several genes co-regulated by  $\sigma^T$  and GsrN, it may be the case that additional genes are required to  
372 mitigate the hyperosmotic stress conditions that we have tested. Prolonged exposure to other osmotic  
373 stresses and/or different concentrations of osmolytes – including a range of ions – could provide  
374 insight into function of *osrP* activation by the GSR.

375 In a recent study of a diverse set of bacterial species, including *C. crescentus*, growth of  
376 transposon mutant libraries was characterized under multiple environmental conditions (34). In *C.*  
377 *crescentus*, *osrP* disruption resulted in a consistent disadvantage in growth in the presence of sodium  
378 perchlorate (fitness = -1.3, t score = -7.2). Sodium perchlorate is an anionic oxidizing agent. It remains  
379 uncertain how the oxidative, osmotic (or other) effects of sodium perchlorate in the medium affect  
380 fitness of strains harboring transposon disruptions of *osrP*, but this result provides an additional assay  
381 condition for future functional studies of *osrP*.

382

### 383 **On additional GsrN regulatory targets**

384 Proteomic analysis of the *gsrN*<sup>++</sup> strain showed strikingly different sets of regulated genes  
385 between untreated and hyperosmotic stress conditions. In untreated cultures of *gsrN*<sup>++</sup>, all proteins  
386 with significant differential expression were under negative control of GsrN; there was no overlap with  
387 the differentially expressed proteins we observed in stress-treated cultures. Although GsrN may not  
388 directly control expression of all differentially regulated proteins in this dataset, the effect we observe  
389 upon *gsrN* overexpression in the absence of stress points to a role for GsrN during normal growth  
390 **(Table 1)**. Notably, the cell-cycle phosphotransfer protein ChpT is significantly downregulated in the  
391 *gsrN*<sup>++</sup> strain. ChpT is an essential protein is required for phosphorylation of the essential cell-cycle  
392 master regulator, CtrA (35). Given the established connection between levels of CtrA and  $\sigma^T$  during  
393 nutrient limitation (36), it is conceivable that GsrN regulates the core cell cycle control system of *C.*  
394 *crescentus* under certain conditions.



395 Under hyperosmotic conditions, we observed only a few cases of proteins that differ in steady-  
396 state levels between *gsrN*<sup>+</sup> and wild type. Among the negatively regulated proteins are three TonB-  
397 dependent receptors of unknown function (*CCNA\_00028*, *CCNA\_00214*, and *CCNA\_3023*) and a  
398 predicted efflux complex (*CCNA\_02172-74*) (**Tables 2 and 3**). *GsrN* may therefore have a functional  
399 role that is similar to the sRNAs, *MicA* and *RybB*, which are transcribed during envelope stress by  $\sigma^E$   
400 in *E. coli* and repress outer membrane proteins (OMP) to mitigate accumulation of unfolded OMPs  
401 (37).

402 Among the genes activated at the transcript level by *GsrN* during hyperosmotic stress are  
403 several with predicted  $\sigma^T$ -binding sites in their promoters (*CCNA\_00709*, *CCNA\_03889*, and  
404 *CCNA\_03694-CCNA\_03595*), which may provide additional cases of coherent FFLs. As discussed  
405 previously, expression of these genes may be sensitive to *GsrN* accumulation during prolonged stress.  
406 *CCNA\_00709* – a predicted small, two-pass membrane protein – and *CCNA\_03694* – a transcription  
407 factor – are attractive targets to investigate in future studies on the mechanism by which *GsrN*  
408 determines cell survival during hyperosmotic stress.

409

## 410 **Materials and Methods**

411 All *C. crescentus* experiments were conducted using strain CB15 (38) and derivatives thereof.

412

413 **Growth of *E. coli* and *C. crescentus*.** *C. crescentus* was cultivated on peptone-yeast extract (PYE)-  
414 agar (0.2% peptone, 0.1% yeast extract, 1.5% agar, 1 mM MgSO<sub>4</sub>, 0.5 mM CaCl<sub>2</sub>) (39) supplemented  
415 with 1.5% agar at 30°C. Antibiotics were used at the following concentrations on this solid medium:  
416 kanamycin 25 mg/ml, tetracycline 2mg/ml, nalidixic acid 20 mg/ml, and chloramphenicol 2 mg/ml. For  
417 liquid culture, *C. crescentus* was cultivated in either PYE or in M2X defined medium (39). PYE liquid:  
418 0.2%(w/v) peptone, 0.1%(w/v) yeast extract, 1 mM MgSO<sub>4</sub>, and 0.5 mM CaCl<sub>2</sub>, autoclaved before use.  
419 M2X defined medium: 0.15% (w/v) xylose, 0.5 mM CaCl<sub>2</sub>, 0.5 mM MgSO<sub>4</sub>, 0.01 mM Fe Chelate, and  
420 1x M2 salts, filtered with a 0.22 micron bottle top filter. One liter of 20x M2 stock was prepared by  
421 mixing 17.4 g Na<sub>2</sub>HPO<sub>4</sub>, 10.6 KH<sub>2</sub>PO<sub>4</sub>, and 10 g NH<sub>4</sub>Cl. Antibiotics were used at the following

422 concentrations in liquid medium: kanamycin 5 mg/ml, tetracycline 1 mg/ml, and chloramphenicol 2  
423 mg/ml. For cultivation of *E. coli* in liquid medium, we used lysogeny broth (LB). Antibiotics were used  
424 at the following concentrations: kanamycin 50 mg/ml, tetracycline 12 mg/ml, and chloramphenicol 20  
425 mg/ml.

426

427 **Plasmid transformation into *C. crescentus*.** Plasmids were conjugated into CB15 (39) using the *E.*  
428 *coli* helper strain FC3 (40)(see **Table S1**). Conjugations were performed by mixing the donor *E. coli*  
429 strain, FC3, and the CB15 recipient strain in a 1:1:5 ratio. Mixed cells were pelleted for 2 min at  
430 15,000xg, resuspended in 100 mL, and spotted on a nonselective PYE-agar plate for 12–24 hr.  
431 Exconjugants containing the desired plasmid were selected on PYE agar containing the plasmid-  
432 specified antibiotic for selection and antibiotic nalidixic acid (20 mg/ml) to counter-select against both  
433 *E. coli* strains (helper and plasmid donor). Plasmids pMT552 and pMT680 integrate into the *vanA* and  
434 *xytX* locus respectively. pMT680 carries a chloramphenicol resistance marker gene (*cat*) and pMT552  
435 carries a kanamycin resistance marker gene (*npt1*) (41). pNPTS138 integration occurs at a  
436 chromosomal site homologous to the insertion sequence.

437

438 **Chromosomal deletion and allele replacement in *C. crescentus*.** To generate the in-frame  
439 deletion and C-terminal FLAG-tagged *osrP* (*CCNA\_00882*) alleles ( $\Delta osrP$  and *osrP::M2*, respectively),  
440 we implemented a double crossover recombination strategy using the pNPTS138 plasmid (42, 43).  
441 Briefly, an in-frame deletion allele of *osrP* was generated using primers listed in **Table S2** in the  
442 supplemental material and combined using splice-overlap-extension. The deletion allele carries a 5'  
443 (UP) and 3' (DOWN) flanking sequences of *osrP* and was ligated in the multiple cloning site (MCS) of  
444 a digested pNPTS138 using the restriction enzymes HindIII and SpeI. The tagged allele *osrP::M2*  
445 was generated using three pieces, two with primers and one with a gene block (Gblock) listed in  
446 **Table S2**. The tagged allele was inserted using Gibson assembly of all three pieces and the same cut  
447 plasmid of the  $\Delta osrP$  plasmid. The first recombination was achieved using a tri-parental mating  
448 described in the “Plasmid integration in *C. crescentus*” section with the plasmid-specified antibiotic,

449 kanamycin (5 mg/ml). Single colony exconjugants were inoculated into liquid PYE for 6–16 hours in a  
450 rolling 30°C incubator for non-selective growth. Nonselective liquid growth allows for the second  
451 recombination event to occur, which either restores the native locus or replaces the native locus with  
452 the pNPTS138 insertion sequence. Counter-selection for the second recombination of pNPTS138 was  
453 carried out on PYE agar with 3% (w/v) sucrose. This selects for loss of the *sacB* gene during the  
454 second recombination event. Colonies were subjected to PCR genotyping and/or sequencing to  
455 confirm the allele replacement.

456

457 **Complementation construction in *C. crescentus*.** Tandem P1-*gsrN* alleles (overexpression by  
458 multiple copies of P1-*gsrN*) were constructed using a Gblock template amplified with three sets of  
459 unique primers. Each end of the amplified products contained unique overlap ends for Gibson  
460 assembly into pMT552 digested with KpnI and SacI. *gsrN* alleles cloned into the *vanA* locus are  
461 antisense to the vanillate inducible *vanA* promoter. An in-frame stop codon was designed at the  
462 restriction enzyme/ligation site downstream of the *vanA* promoter to ensure that translational read-  
463 through of the *vanA* transcript did not disrupt *gsrN* transcription. Xylose-inducible *osrP* (pMT680-*osrP*)  
464 had its entire coding sequence cloned in frame with the start site of *xyIX*.

465

466 **β-galactosidase reporter construction in *C. crescentus*.** Transcriptional and transcriptional-  
467 translational (TT) reporters utilized the replicating plasmids pRKlac290 and pPR9TT, respectively (39,  
468 44). pRKlac290 has a tetracycline resistance marker and pPR9TT has a chloramphenicol resistance  
469 marker. Insertion sequences of *osrP* used the primers in **Table S2**. The template for *osrP(RS1)* was  
470 created using splice-overlap-extension and the template for *osrP(RS2)* was a gblock. Templates were  
471 then amplified with the same primers as the wild-type *osrP* reporters. The transcriptional reporter used  
472 the restriction sites EcoRI and HindIII to ligate into pRKlac290. The transcriptional-translational  
473 reporter used the restriction sites KpnI and HindIII to ligate into pPR9TT.

474

475 **Osmotic stress assay.** Liquid cultures were passaged several times before stress treatment to  
476 insure that population growth rate and density were as consistent as possible prior to addition of  
477 sucrose (hyperosmotic stress). Briefly, starter cultures were inoculated in liquid M2X medium from  
478 colonies grown on PYE-agar plates. Cultures were grown overnight at 30°C in a rolling incubator.  
479 Overnight cultures were then diluted back to an optical density reading of  $OD_{660} = 0.05$  and grown in a  
480 rolling incubator at 30°C for 7–10 hr. After this period, cultures were re-diluted with M2X to  $OD_{660} =$   
481 0.025 and grown overnight for 16 hr at 30°C in a rolling incubator. After this period,  $OD_{660}$  was  
482 consistently 0.85–0.90. These cultures were then diluted to  $OD_{660} = 0.05$  and grown for 1 hr and split  
483 into two tubes. One tube received sucrose treatment from a liquid stock of 80% (w/v) and the other  
484 tube was treated with water. Both cultures were grown for 5 hours in a rolling 30°C post treatment of a  
485 final concentration of 300 mM sucrose. This allowed for the dynamic range to compare CFUs from  
486  $\Delta gsrN$ , wild type, and  $gsrN^{++}$ . Treated cultures and untreated cultures were subsequently titered (10  
487 mL sample in 90 mL of PYE) by initially diluting into 96-well plates. 5 mL spots from each dilution were  
488 plated on PYE-agar. Once spots dried, plates were incubated at 30°C for 2 days. Clearly visible  
489 colonies begin to form after 36 hours in the incubator.

490

491 **Northern Blot.** RNA samples were resolved on a urea-denaturing 10% acrylamide: bisacrylamide  
492 (29:1), transferred onto a Zeta-Probe Blotting Membrane with a Trans-Blot® SD Semi-Dry Transfer Cell.  
493 Blots were hybridized with a hybridization buffer containing the radiolabeled oligonucleotide probes in  
494 a rolling 65°C incubator. Hybridization buffer had a GsrN probe concentration ~1 nM and 5S rRNA  
495 probe concentration was ~2 pM. Membranes were then wrapped in plastic wrap and placed directly  
496 against a Molecular Dynamics Phosphor Screen. Screens were imaged with Personal Molecular  
497 Imager™ (PMI™) System. For detailed buffer recipes and step-by-step instructions refer to (11).  
498 Cultures used for the extraction of RNA were passaged in the same manner outlined in the “Osmotic  
499 stress assays” section above. Exponential phase cultures were harvested from the last starter (i.e.,  
500 the  $OD_{660}=0.05$  culture at the 16 hour time point) when it reached an  $OD_{660}$  of 0.20-0.25. Exponential  
501 phase cultures ( $OD_{660}$  of 0.20-0.25) harvested for extraction of RNA were pelleted at 15000x g for 3

502 minutes at  $\approx 23^{\circ}\text{C}$  (i.e. room temperature) and subjected to a TRIzol extraction (refer to detailed  
503 protocol (11)). Radiolabeled oligonucleotides were labeled with T4 PNK (refer to (11) for detailed  
504 protocol). Oligonucleotide sequences used for Northern blot probing can be found in **Table S2** in the  
505 supplement material.

506

507 **RNA-Seq sample preparation and analysis.** RNA-Seq samples were extracted using the TRIzol  
508 protocol described in (11). For the first RNA-Seq experiment with seven  $\Delta sigT$  (3 stressed and 4  
509 unstressed) and eight WT (4 stressed and 4 unstressed) samples, cells were grown similarly to those  
510 described in the “Osmotic stress assay” section. Specifically, liquid M2X cultures were inoculated from  
511 PYE agar plates and grown shaking at 200 RPM,  $30^{\circ}\text{C}$  overnight. Cultures were then diluted into  
512 fresh M2X to  $\text{OD}_{660} = 0.025$  and grown at 200 RPM,  $30^{\circ}\text{C}$  for 18 hours. These overnight cultures were  
513 then diluted to  $\text{OD}_{660} = 0.15$ , and grown for 1 hour at 200 RPM,  $30^{\circ}\text{C}$  before the addition of 150 mM  
514 Sucrose (treated) or water (untreated). Samples were grown for 3 hours at 200 RPM,  $30^{\circ}\text{C}$  before  
515 TRIzol extractions. Resuspended RNA pellets after the 75% ethanol wash were purified twice by  
516 RNeasy Mini Kit column (100  $\mu\text{L}$  sample, 350  $\mu\text{L}$  RLT, 250  $\mu\text{L}$  100% ethanol). In each iteration,  
517 immobilized RNA was subjected to an on-column DNase digestion with TURBO™ DNase for 30  
518 minutes at  $30^{\circ}\text{C}$  with 70  $\mu\text{L}$  DNase Turbo (7  $\mu\text{L}$  DNase, 7  $\mu\text{L}$  10X Buffer, 56  $\mu\text{L}$   $\text{diH}_2\text{O}$ ) before washing  
519 and elution. For the second RNA-Seq experiment with 8  $gsrN^{++}$  (4 stressed and 4 unstressed) and 6  
520 WT (3 stressed and 3 unstressed) samples, cells were grown as described in the “Osmotic stress  
521 assay” section. Specifically, treated cultures were grown for 5 hours in M2X with a final concentration  
522 150 mM sucrose and untreated with water in a rolling  $30^{\circ}\text{C}$  incubator before TRIzol extractions.  
523 Resuspended RNA pellets after the 75% ethanol wash were loaded onto an RNeasy Mini Kit column  
524 (100  $\mu\text{L}$  sample, 350  $\mu\text{L}$  RLT, 250  $\mu\text{L}$  100% ethanol). Immobilized RNA was then subjected to an on-  
525 column DNase digestion with TURBO™ DNase. DNase treatment was repeated twice on the same  
526 column; each incubation was 30 minutes at  $30^{\circ}\text{C}$  with 70  $\mu\text{L}$  solutions of DNase Turbo (7  $\mu\text{L}$  DNase, 7  
527  $\mu\text{L}$  10x Buffer, 56  $\mu\text{L}$   $\text{diH}_2\text{O}$ ). For all RNA-seq samples, after elution from the RNeasy column, rRNA  
528 was depleted using Ribo-Zero rRNA Removal (Gram-negative bacteria) Kit (Epicentre). RNA-seq

529 libraries were prepared with an Illumina TruSeq stranded RNA kit according to manufacturer's  
530 instructions. The libraries were sequenced on an Illumina HiSeq 4000 at the University of Chicago  
531 Functional Genomics Facility. Analysis of whole genome RNA-seq data was conducted using the CLC  
532 Genomics Workbench version 11.0. Reads were mapped to the *C. crescentus* NA1000 genome  
533 (accession CP001340.1) (45).

534

535 **Soluble protein extraction for LC-MS/MS and analysis.** Total soluble protein for proteomic  
536 measurements was extracted from cultures passaged similarly to the “Osmotic stress assays” section,  
537 except that cultures were subjected to 150 mM sucrose. Cells were spun down at 8000g at 4°C for 15  
538 minutes. Cells were resuspended in 6 mL of ice-cold lysis buffer. Cells were mechanically lysed in  
539 LV1 Microfluidizer. Lysate was then spun down at 8000g at 4°C for 15 minutes. Protein samples were  
540 resolved on a 12% MOPS buffered 1D Gel (Thermo Scientific) for 10 minutes at 200V constant. Gel  
541 was stained with Imperial Protein stain (Thermo Scientific), and a ~2 cm plug was digested with  
542 trypsin. Detailed trypsin digestion and peptide extraction by the facility is published in (46). Samples  
543 for analysis were run on an electrospray tandem mass spectrometer (Thermo Q-Exactive Orbitrap),  
544 using a 70,000 RP survey scan in profile mode, m/z 360-2000 Fa, with lockmasses, followed by 20  
545 MS/MS HCD fragmentation scans at 17,500 resolution on doubly and triply charged precursors.  
546 Single charged ions were excluded, and ions selected for MS/MS were placed on an exclusion list for  
547 60s (46). Raw files of LC-MS/MS data were processed using the MaxQuant software suite v1.5.1.2  
548 (47). Samples were run against a FASTA file of proteins from the UniProt database (UP000001364)  
549 and standard contaminants. The label free quantitation (LFQ) option was turned on. Fixed  
550 modification included carbamidomethyl (C) and variable modifications were acetyl or formyl (N-term)  
551 and oxidation (M). Protein group files were created for two comparisons: wild-type (3 samples) versus  
552 *gsrN<sup>+</sup>* (4 samples) untreated and wild-type (3 samples) versus *gsrN<sup>+</sup>* (4 samples) sucrose-treated.  
553 LFQ values for each proteingroup.txt file were extracted for analysis. Average LFQ values were only  
554 calculated if 2 or more LFQ values were found for wild-type samples and if 3 or more LFQ values  
555 were found for *gsrN<sup>+</sup>* samples. This allowed for protein groups that had a sufficient amount of signal

556 across all the samples and analyses to be considered for comparison. Once averages for each  
557 protein group were calculated, we calculated the fold change between samples from different  
558 backgrounds by dividing the averages and taking the log-2 transformation,  $\log_2(\text{Fold})$ . Multiple t-tests  
559 were conducted using the LFQ criteria described previously. We used the multiple t-test analysis from  
560 GraphPad Prism version 7.0 for MacOS, GraphPad Software, La Jolla California USA,  
561 [www.graphpad.com](http://www.graphpad.com). The false discovery rate (Q) value was set to 5.000% and each row was  
562 analyzed individually, without assuming a consistent SD.

563

564  **$\sigma^T$ -binding site search.** A binding site search was conducted on negative differentially regulated  
565 genes identified in the RNA-Seq study (i.e. genes downregulated in  $\Delta sigT$  relative to wild type; fold  
566 change  $\leq -1.5$  and FDR  $\leq 0.05$ ) (**Table S3**). From this set of genes, we organized all genes into  
567 operon units based on the DOOR database (48, 49); however, we only put a gene into the context of  
568 an operon if the leading gene in the operon was also in the core *sigT* regulon. We then took the lead  
569 genes for each operon and searched 250 nucleotides upstream of the annotated coding start site.  
570 These windows were then scanned for the degenerate  $\sigma^T$ -binding site combinations described in **Fig.**  
571 **S2.**

572

573 **5' rapid amplification of cDNA ends (RACE).** Rapid amplification of cDNA 5'ends of *GsrN* was  
574 carried out using components of the FirstChoice RLM-RACE Kit. Cloning of cDNA library was carried  
575 out with the Zero Blunt TOPO PCR Cloning Kit. Total RNA from *gsrN<sup>+</sup>* strains was extracted from  
576 stationary phase cultures (OD660 = 0.95–1.0) as described in the “Northern Blot” section. Briefly, 10  
577 mL Tobacco Acid Pyrophosphatase (TAP) reactions used 5 mg of total RNA with 2 mL of TAP and 1  
578 mL of TAP buffer with remaining volume comprised of Nuclease-free water. Reactions were incubated  
579 at 37°C for 1 hour. TAP-treated samples were then subjected to ligation in parallel with no-TAP total  
580 RNA samples. Tap RNA sample ligation reactions (10 mL) follow: 2 mL of TAP treated RNA, 1 mL of  
581 5'RACE adaptor, 1 mL of T4 RNA Ligase, 1 mL 10X T4 RNA Ligase Buffer, and 4 mL Nuclease-free  
582 water. No-TAP RNA sample ligation reactions (10 mL) follow: 3 mg of untreated total RNA, 1 mL of



583 5'RACE adaptor, 1 mL of T4 RNA Ligase, 1 mL 10X T4 RNA Ligase Buffer, and remaining volume of  
584 Nuclease-free water. Reactions were incubated at 37°C for 1 hr. For the reverse transcription reaction  
585 (first strand synthesis), we used the random dodecamer provided in the kit, as well as, the M-MLV  
586 Reverse transcriptase and used the recommended reaction volumes in the kit. Reaction was  
587 incubated at 42°C for 1 hour. Samples were then kept frozen in a -20°C freezer. For second strand  
588 synthesis and amplification, we used KOD Hot Start DNA Polymerase with the 5'RACE inner primer  
589 complementary to the adaptor and an *osrP*-specific primer 380 nucleotides away from the coding start  
590 site (**Table S2**). The 25 mL reactions follow: 12.5 mL 2X Buffer, 0.5 mL KOD Polymerase, 5 mL of 2  
591 mM dNTP, 2.5 mL of 50% DMSO, 1.5 mL of 5 mM forward primer, 1.5 mL of 5 mM reverse primer,  
592 and 1.5 mL of reverse transcribed 1st strand synthesis cDNA. Reaction protocol follows: 3 min 95°C  
593 incubation, followed by a 35-cycle reaction consisting of a 15 s 95°C melting step, a 15 s 60°C  
594 annealing step, a 30 s 68°C extension step, and a final 1 min 68°C extension step. PCR products  
595 were blunt-cloned using the Zero Blunt TOPO PCR Cloning Kit. First, a 5 mL pre-reaction mix  
596 consisting of 2 mL PCR product, 1 mL kit salt solution, and 2 mL water was prepared. 1mL of the  
597 pCR-Blunt II-TOPO was then added to the pre-reaction mix and incubated at room temperature for 5  
598 min and then immediately put on ice. Ligation reaction was then incubated with ice-thawed chemically  
599 competent *E. coli* cells for 5 min. Cells were heat shocked for 30 s at 42°C, then incubated on ice for 5  
600 min. 250 mL of SOC media was then added to the cells and incubated 37°C in a shaking incubator.  
601 Fifty microliters of outgrown cells were placed on LB-Kanamycin plates with an antibiotic  
602 concentration of 50 mg/mL. Single colonies were grown overnight and sequenced with an internal  
603 *osrP* specific primer that maps 300 nucleotides from the annotated coding start and M13R primers  
604 (**Table S2**). Sequences were submitted to the University of Chicago Comprehensive Cancer Center  
605 DNA Sequencing and Genotyping Facility. Chromatograph traces were analyzed with Geneious  
606 11.0.2. Traces were subjected to mapping and trimming of the 5'RACE inner primer/adaptor  
607 sequence and the flanking regions used for blunt-cloning.

608



609  **$\beta$ -galactosidase assay.** To assess reporter gene expression, liquid cultures were passaged several  
610 times as described in the “Osmotic stress assay” section above. However, cultures were placed in a  
611 30°C shaker instead of a 30°C rolling incubator. Exponential phase cultures were taken from the  
612  $OD_{660} = 0.05$  culture made from the 16 hr overnight culture and split when an  $OD_{660} \sim 0.09-0.1$  was  
613 reached. One split culture was treated to a final concentration of 150 mM sucrose and the other with  
614 the equal volume of water. Stress and unstressed cultures were then grown for three hours in a 30°C  
615 shaker and then harvested.  $\beta$ -galactosidase activity from chloroform-permeabilized cells was  
616 measured using the colorimetric substrate o-nitrophenyl-b-D-galactopyranoside (ONPG). 1 mL  
617 enzymatic reactions contained 350  $\mu$ L of chloroform-permeabilized cells, 550  $\mu$ L of Z-buffer (60 mM  
618  $Na_2HPO_4$ , 40 mM,  $NaH_2PO_4$ , 10 mM KCl, 1 mM  $MgSO_4$ ), and 200  $\mu$ L of 4 mg/mL ONPG in 0.1 M  
619  $KPO_4$ , pH 7.0. Chloroform-permeabilized cell samples were prepared from 150  $\mu$ L of culture, 100  $\mu$ L  
620 of PYE, and 100  $\mu$ L of chloroform (chloroform volume is not included in the final calculation of the 1  
621 mL reaction). Chloroform-treated cells were vortexed for 5–10 seconds to facilitate permeabilization. Z  
622 buffer and ONPG were added directly to chloroform-permeabilized cells. Reactions were incubated in  
623 the dark at room temperature and quenched with 1 mL of 1 M  $Na_2CO_3$ . Each reporter construct was  
624 optimized with different reaction times empirically determined by the development of the yellow ONPG  
625 pigment. Miller units were calculated as:

$$MU = \frac{A_{420} \times 1000}{A_{660} \times t \times v}$$

626  $A_{420}$  is the absorbance of the quenched reaction measured at 420 nm on a Spectronic Genesys 20  
627 spectrophotometer (ThermoFisher Scientific, Waltham, MA).  $A_{660}$  is the optical density of the culture of  
628 cells used for the assay.  $t$  is time in minutes between the addition of ONPG and the quenching with  
629  $Na_2CO_3$ .  $v$  is the volume in milliliters of the culture added to the reaction.

630

631 **Western Blot.** Strains from which protein samples were prepared for Western blot analysis were  
632 grown and passaged as outlined in the “Osmotic stress assays” section; however, cultures were  
633 grown to an  $OD_{660}=0.25-0.30$ , split, and treated with 150 mM sucrose for 3.5 hours. This change

634 allowed for detection of *osrP::M2* signal in untreated *gsrN<sup>+</sup>* cultures and treated wild-type cultures. 4.5  
635 mL of these cultures was then pelleted, resuspended in 100  $\mu$ L of Western blot buffer (10 mM Tris pH  
636 7.4, 1 mM CaCl<sub>2</sub>, and 5  $\mu$ g/mL of DNase), and mixed with 100  $\mu$ L SDS-Loading buffer. Samples were  
637 boiled at 85°C for 10 minutes, and 25-30  $\mu$ L of each sample was loaded onto a Mini-PROTEAN TGX  
638 Precast Gradient Gel (4-20%) with Precision Plus Protein™ Kaleidoscope™ Prestained Protein  
639 Standards. Samples were resolved at 35 mA constant current in SDS running buffer (0.3% Tris,  
640 18.8% Glycine, 0.1% SDS). Gels were run until the 25 kDa marker reached the bottom of the gel. Gel  
641 was transferred to an Immobilon®-P PVDF Membrane using a Mini Trans-Blot® Cell after  
642 preincubation in Western transfer buffer (0.3% Tris, 18.8% Glycine, 20% methanol). Transfer was  
643 carried out at 4°C, 100 V for 1 hour and 20 minutes in Western transfer buffer. The membrane cut into  
644 two pieces right above the 50kD marker. Top half was stained with Coomassie Brilliant Blue for 10  
645 minutes, washed with 45% Ethanol and 10 % Acetic acid, and then washed again with 90% Ethanol  
646 10% Acetic acid. Upon destaining, image was taken with a ChemiDoc MP Imaging System version  
647 6.0. Bottom half was blocked in 5% (w/v) powdered milk in Tris-buffered Saline Tween (TBST: 137  
648 mM NaCl, 2.3 mM KCl, 20 mM Tris pH 7.4, 0.1% (v/v) of Tween 20) overnight at room temperature on  
649 a rotating platform. Primary incubation with a DYKDDDDK(i.e. M2)-Tag Monoclonal Antibody (clone  
650 FG4R) was carried out for 3 hours in 5% powdered milk TBST at room temperature on a rotating  
651 platform (4  $\mu$ L antibody in 12 mL). Membrane was then washed 3 times in TBST for 5 minutes each at  
652 room temperature on a rotating platform. Secondary incubation with Goat anti-Mouse IgG (H+L)  
653 Secondary Antibody, HRP was for 1 hour at room temperature on a rotating platform (3  $\mu$ L antibody in  
654 15 mL). Finally, membrane was washed 3 times in TBST for 10 minutes each at room temperature on  
655 a rotating platform. Chemiluminescence was performed using the SuperSignal™ West Femto  
656 Maximum Sensitivity Substrate and was imaged using a ChemiDoc MP Imaging System version 6.0.  
657 Chemiluminescence was measured using the ChemSens program with an exposure time of ~2.5  
658 minutes.  
659

660 **Accession number(s).** RNA-Seq data are available in the NCBI GEO Database under accession  
661 GSE114971. LC-MS/MS data is available in the PRIDE proteomic database under accession  
662 PXD010072.

663

#### 664 **Acknowledgements**

665 This work was funded by NIH award R01GM087353 to SC. M.Z.T was supported by an NSF  
666 Graduate Research Fellowship, and B.J.S. is supported by NIH award F32GM128283.

667

668

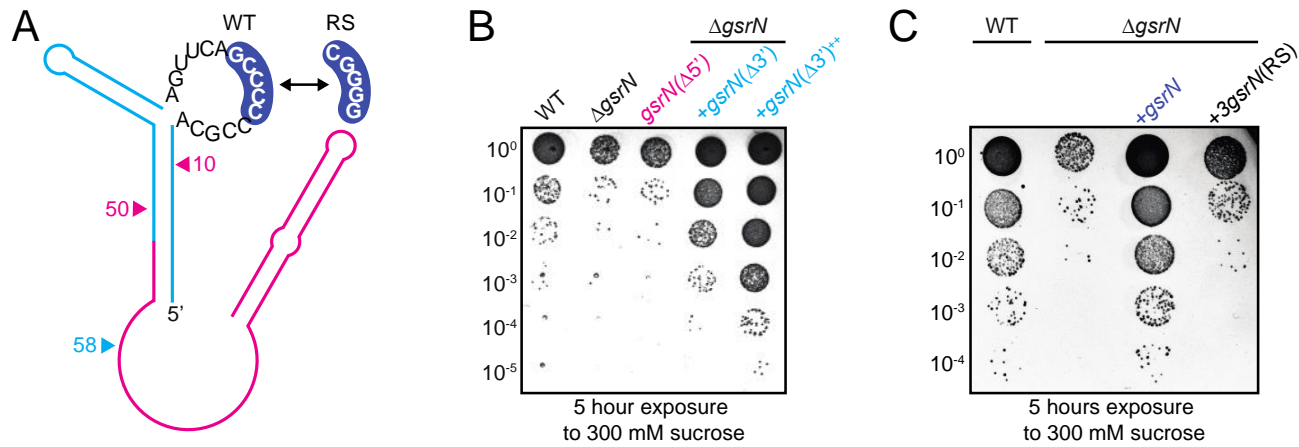

669

670 **FIG 1 Modifying the 5' cytosine-rich loop of GsrN reduces *Caulobacter* viability under hyperosmotic**  
 671 **stress.** (A) Secondary structure model of GsrN. Bases in the 5' C-rich loop are displayed. GsrN undergoes  
 672 endonucleolytic processing; cyan lines indicate the 5' end of GsrN and pink lines indicate the 3' end of GsrN  
 673 (post-processing). Pink arrows refer to residues 10 and 50 in the sequence of GsrN, which are deleted from  
 674 strain *gsrN*( $\Delta$ 5'). Cyan arrow marks the 5' end of GsrN construct, *gsrN*( $\Delta$ 3'). Blue highlighted bases in the C-rich  
 675 loop of GsrN were replaced in the mutant, *gsrN*(RS). (B) Hyperosmotic stress survival assay of *Caulobacter* wild  
 676 type (WT) and *gsrN* mutant strains. Strains were treated with 300 mM sucrose for 5 hours in a rolling incubator,  
 677 titered, and plated at 30°C, and colony forming units (CFUs) were enumerated. Plate presented is  
 678 representative of triplicate assays. Quantification of CFUs in treated versus untreated strains are presented in  
 679 Fig. S1 in supplemental material. (C) Hyperosmotic survival assay of WT and  $\Delta$ gsrN complemented with either  
 680 *gsrN*(RS) and or wild type *gsrN*. Plate is representative of triplicate assays. Quantification of CFUs in treated  
 681 versus untreated strains are presented in Fig. S1 in supplemental material.

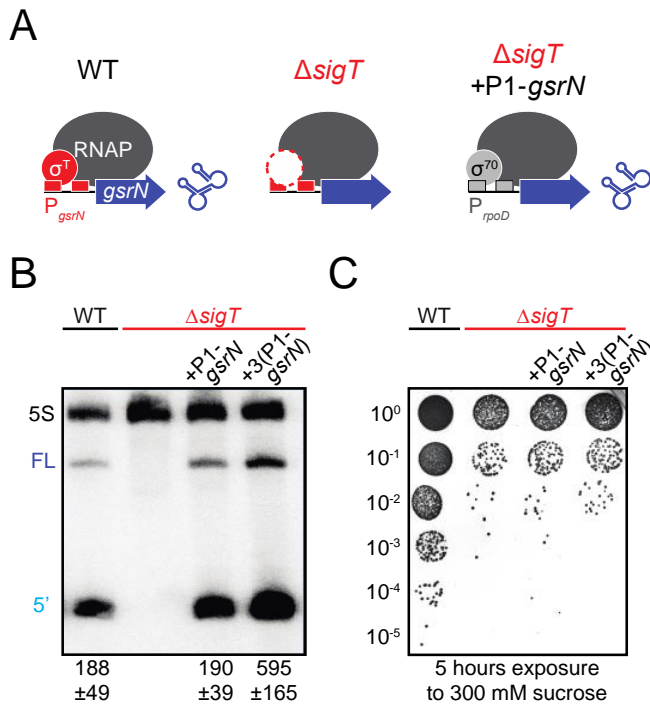

682

683 **FIG 2 *gsrN*-dependent osmotic stress protection requires *sigT*.** (A) Schematic of *gsrN* transcription in wild  
684 type (WT),  $\Delta sigT$ , and a  $\Delta sigT$  strain bearing the P1-*gsrN* expression system ( $\Delta sigT$ +P1-*gsrN*). P1 is a  
685 RpoD( $\sigma^{70}$ )-dependent promoter. (B) Northern blot of total RNA from wild type,  $\Delta sigT$ ,  $\Delta sigT$ +P1-*gsrN*, and  
686  $\Delta sigT$ +3(P1-*gsrN*) probed with radiolabeled oligos specific to GsrN and 5S rRNA (loading control). Labels on the  
687 left refer to 5S rRNA (5S in black), full-length GsrN (FL in dark blue), and the 5' isoform of GsrN (5' in cyan).  
688 Quantified values below the blot are mean  $\pm$ SD of total normalized signal (FL + 5'), n = 3 independent replicates.  
689 (C) Hyperosmotic stress survival assay of wild type (WT) and  $\Delta sigT$  expressing P1-*gsrN* or 3(P1-*gsrN*). Plate is  
690 representative of triplicate assays. Quantification of CFUs in treated versus untreated strains are presented in  
691 Fig. S1 in supplemental material.

692

693

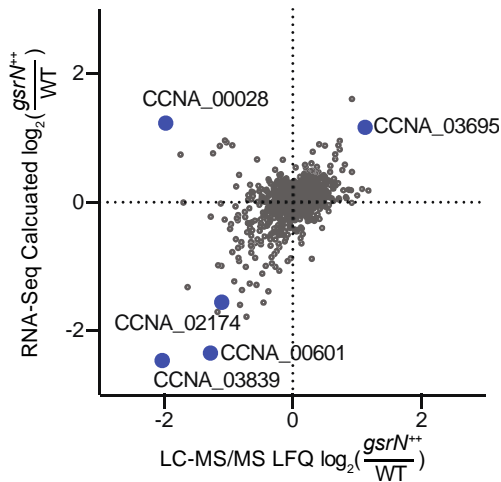

694

695 **FIG 3 *gsrN*-regulated genes under hyperosmotic conditions.** Transcriptomic and proteomic analysis of  
696 *gsrN<sup>++</sup>* and wild type (WT) strains after sucrose-induced hyperosmotic stress. Only genes detected in both  
697 analyses are plotted. Blue points indicate genes whose transcript and protein levels differed significantly  
698 between *gsrN<sup>++</sup>* and WT. Significant differential regulation cutoff was  $\log_2(\text{fold}) > 1.0$  and FDR *p-value* < 0.05 for  
699 both transcript and protein based on Wald's Test and Student's t-test, respectively. RNA-Seq data set  
700 comprises of 3 wild-type unstressed, 3 wild-type stressed, 4 *gsrN<sup>++</sup>* unstressed, and 4 *gsrN<sup>++</sup>* stressed  
701 conditions. LC-MS/MS data set comprises the same number of samples for each respective strain and  
702 treatment.

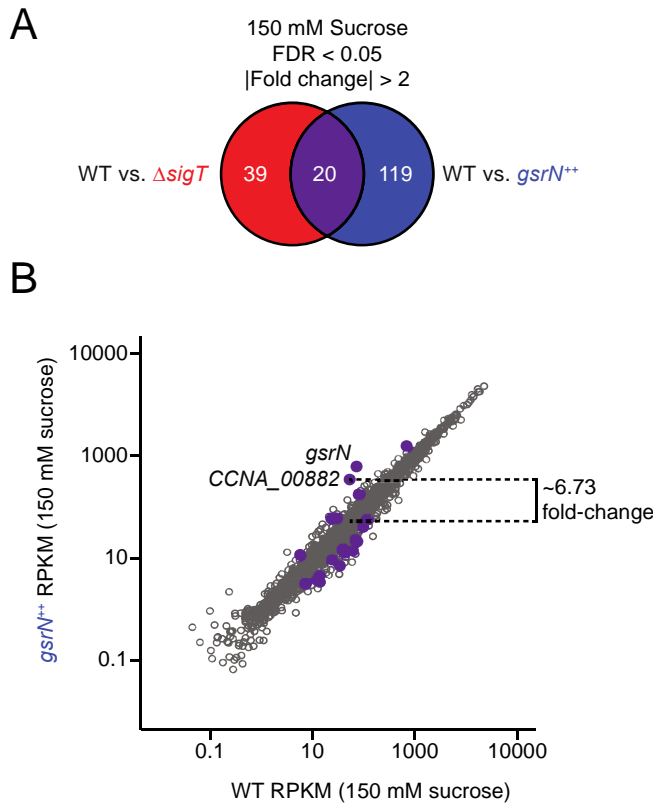

703

704 **FIG 4 Comparative RNA-seq analysis uncovers candidate targets of GsrN under hyperosmotic stress.**

705 (A) RNA-Seq Venn summary of common differentially regulated genes (purple) in wild type (WT) versus  $\Delta sigT$

706 (red) and WT versus  $gsrN^{++}$  (blue) during sucrose-induced hyperosmotic stress. Significant differential regulation

707 cutoff was  $\log_2(\text{fold}) > 1.0$  and FDR  $p\text{-value} < 0.05$  for both comparisons. (B) Measured transcript abundance,

708 reads per kilobase per million (RPKM) --  $\log_{10}$  scale -- of WT and  $gsrN^{++}$  samples isolated from strains subjected

709 to sucrose-induced hyperosmotic stress. Purple points represent genes identified in (A). Dotted line outlines a

710  $2.75 \log_2(\text{fold})$  change of *CCNA\_00882* (*osrP*) between  $gsrN^{++}$  and WT.

711

712

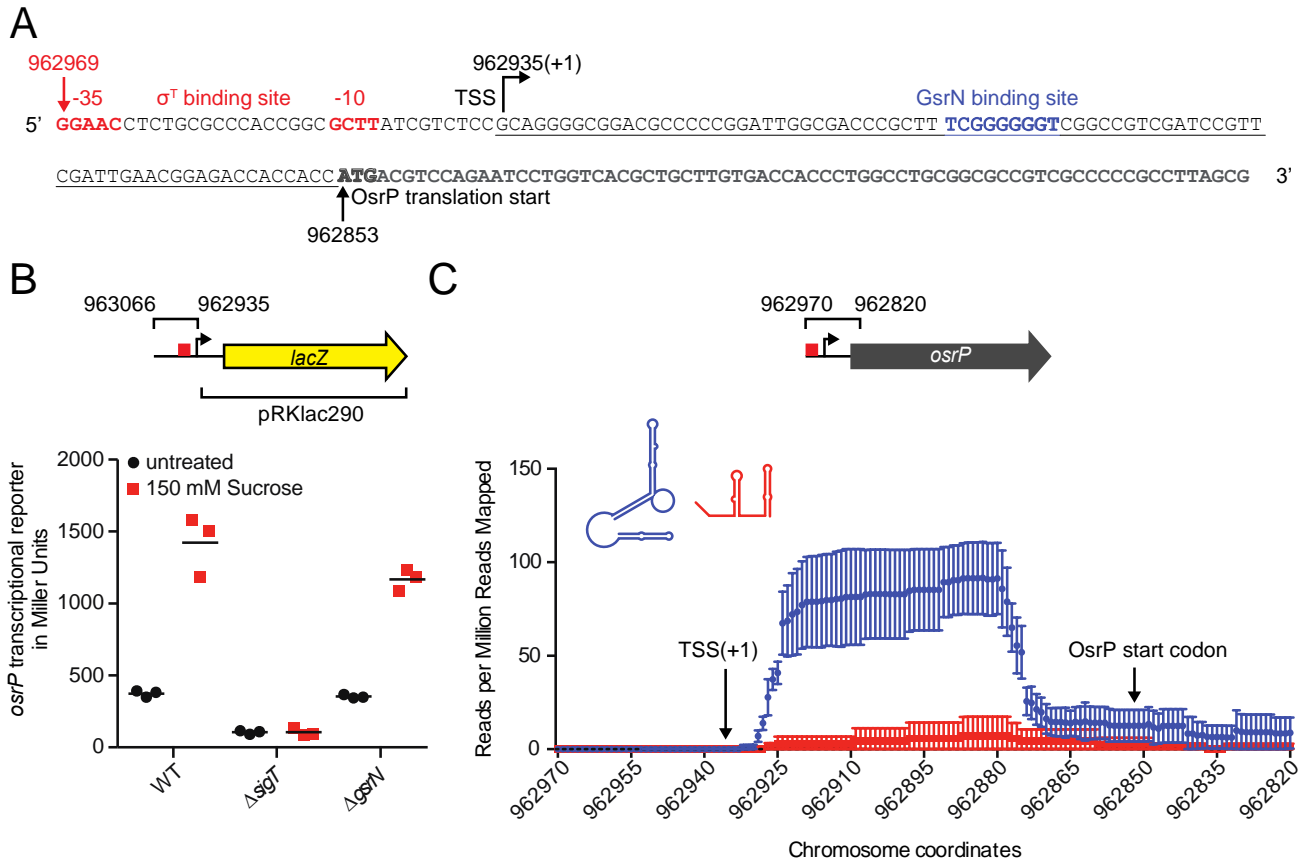

713

714 **FIG 5 *osrP* is transcribed by  $\sigma^T$  and is upregulated during hyperosmotic stress.** (A) *osrP* promoter and  
 715 leader sequence through the *osrP* translation start site is pictured. Bent arrow indicates the location of the  
 716 mapped transcriptional start site (TSS) from 5' RACE. Red nucleotides indicate the location of the proposed  $\sigma^T$ -  
 717 binding site at -10 and -35. Blue nucleotides indicate the proposed GsrN binding site from (11). Black arrow and  
 718 bolded nucleotides indicate the annotated translation start site of *osrP*. Underlined sequence indicates the  
 719 region corresponding to the 5' leader of *osrP* mRNA. (B)  $\beta$ -galactosidase activity assay (in Miller Units) of the  
 720 pRKLac290-*osrP* transcriptional reporter plasmid in wild type (WT),  $\Delta sigT$ , and  $\Delta gsrN$  backgrounds; a schematic  
 721 of the reporter plasmid marking the cloned region of the *osrP* promoter sequence is pictured above the reporter  
 722 data. Black circles represent measured activity in log phase cultures. Red squares represent measured activity  
 723 in cultures treated with 150 mM sucrose for 3 hours. Horizontal bars mark the mean of three independent  
 724 biological replicates. (C) mRNA that co-purified with *gsrN(37)::PP7hp* (aptamer-tagged GsrN; blue) and  
 725 *PP7hp::gsrN-3'* (negative control; red) quantified as fractional reads mapped to the leader region of *osrP*. Read  
 726 density in each dataset represents read coverage at each nucleotide divided by the number of million reads



727 mapped in that data set. Data represent mean  $\pm$ SD of three replicate *gsrN(37)::PP7hp* and two replicate  
728 *PP7hp::gsrN-3'* purifications.

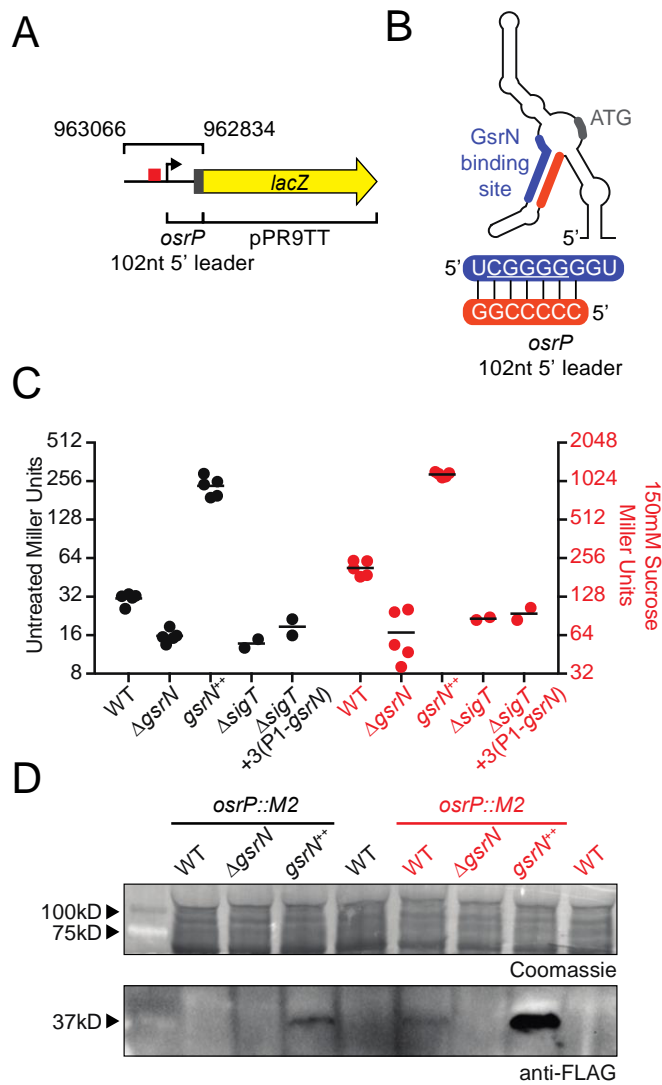

730 **FIG 6. GsrN activates the expression of OsrP at the post-transcriptional level.** (A) Schematic of the  
731 pPR9TT-*osp* transcription plus translation (TT) reporter plasmid. Top black bracket marks the region of *osp*  
732 (upstream region, 5' UTR, and nucleotides encoding the first 7 amino acids) translationally-fused to *lacZ* in  
733 pPR9TT (bottom black bracket). 5' leader of *osp* (5' UTR and nucleotides encoding the first 7 amino acids) are  
734 also identified and comprise 102 bases. (B) Predicted secondary structure (26) of 5' leader of *osp*. A proposed  
735 GsrN binding site is highlighted in blue (see also Fig 5). Base-paired region complementary to the proposed  
736 GsrN binding site is highlighted in orange. Start codon is highlighted in grey. Sequence below shows the  
737 interaction between the predicted GsrN-binding site and the complementary base-paired region within the 5'  
738 leader of *osp*. (C)  $\beta$ -galactosidase activity assay (in Miller Units) of pPR9TT-*osp* reporter plasmid in strains  
739 listed along the x-axis. Left black axis represents the measured reporter activity of untreated cultures on a  $\log_2$   
740 scale. Right red axis represents the measured reporter activity in sucrose-treated cultures (outlined in Fig. 5B)

741 on a  $\log_2$  scale. Data and mean represent at least two biological replicates. (D) Western analysis of total protein  
742 from WT,  $\Delta gsrN$ , and  $gsrN^{++}$  strains containing *osrP::M2*, blotted with anti-FLAG. Western blots of cell lysate  
743 from untreated (black) and sucrose-treated (red) cultures are shown. Sucrose-treatment to induce hyperosmotic  
744 shock was the same as outlined in Fig. 5B. Coomassie-stained membrane (top panel), cut from the blotted  
745 bottom panel, is shown as a loading control. Blot presented is overexposed with the majority of the signal in the  
746 *OsrP::M2* band in the  $gsrN^{++}$  treated lane hitting pixel saturation. Arrows on the left indicate size markers from  
747 protein ladder. Blot and stained membrane are representative of duplicate experiments.

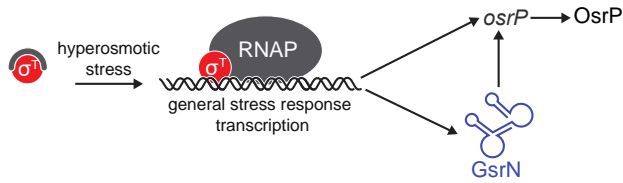

748

749 **FIG 7. Coherent feedforward regulation during hyperosmotic stress in *C. crescentus*.**  $\sigma^T$  is de-repressed  
750 upon exposure to hyperosmotic stress, and binds to core RNA polymerase (RNAP).  $\sigma^T$  subsequently activates  
751 transcription of a set of genes (see Table S3), most notably the sRNA, GsrN. GsrN accumulates in the cell and  
752 functions to either activate or repress expression of genes at the post-transcriptional level (see Table S4). *osrP*  
753 is among a set of genes in the GSR hyperosmotic stress regulon that are upregulated by  $\sigma^T$  at the  
754 transcriptional level and also upregulated by GsrN at the post-transcriptional level, i.e. coherent feedforward  
755 regulation.

756

757  
758

**TABLE 1** Proteins with significant differences in steady-state levels between *gsrN<sup>++</sup>* and wild type (*gsrN<sup>++</sup>* / WT), with associated transcript changes.

| gene name  | annotated function                                                            | RNA-Seq <sup>a</sup>    |         |        | LC-MS/MS <sup>b</sup>   |         |        |
|------------|-------------------------------------------------------------------------------|-------------------------|---------|--------|-------------------------|---------|--------|
|            |                                                                               | log <sub>2</sub> (Fold) | p-value | FDR    | log <sub>2</sub> (Fold) | p-value | FDR    |
| CCNA_02831 | conserved hypothetical protein                                                | -0.57                   | 0       | 0.0002 | -1.10                   | 0.0001  | 0.0134 |
| CCNA_03693 | creatinine amidohydrolase family protein                                      | 0.30                    | 0.0042  | 0.0516 | -1.57                   | 0.0043  | 0.0488 |
| CCNA_01997 | ribosome recycling factor (RRF)                                               | 0.26                    | 0.0687  | 0.3189 | -1.20                   | 0.0002  | 0.0134 |
| CCNA_03852 | phosphoribosylformimino-5-aminoimidazole carboxamide ribonucleotide isomerase | 0.17                    | 0.0883  | 0.3601 | -1.62                   | 0       | 0.0093 |
| CCNA_02388 | ribose 5-phosphate isomerase                                                  | -0.18                   | 0.1314  | 0.4512 | -1.04                   | 0.0002  | 0.0134 |
| CCNA_01378 | protein-L-isoaspartate methyltransferase                                      | 0.17                    | 0.1427  | 0.4707 | -1.09                   | 0.0005  | 0.0156 |
| CCNA_03874 | carboxymethylenebutenolidase                                                  | 0.18                    | 0.1805  | 0.5301 | -1.42                   | 0.0008  | 0.0201 |
| CCNA_03729 | transaldolase-like protein                                                    | 0.18                    | 0.2041  | 0.5633 | -1.39                   | 0       | 0.0093 |
| CCNA_01327 | adenylate kinase/nucleoside-diphosphate kinase Adk                            | 0.15                    | 0.2295  | 0.5976 | -1.93                   | 0.0001  | 0.0134 |
| CCNA_01586 | ABC transporter, ATP-binding protein                                          | 1.15                    | 0.2831  | 0.6632 | -1.97                   | 0.0011  | 0.0232 |
| CCNA_01624 | orotate phosphoribosyltransferase                                             | 0.14                    | 0.3167  | 0.6997 | -1.21                   | 0.0014  | 0.0250 |
| CCNA_00045 | inorganic pyrophosphatase                                                     | 0.12                    | 0.3566  | 0.7311 | -1.27                   | 0.0003  | 0.0155 |
| CCNA_03672 | superoxide dismutase                                                          | -0.12                   | 0.5448  | 0.8605 | -1.22                   | 0.0002  | 0.0134 |
| CCNA_01562 | 4-hydroxy-2-oxoglutarate aldolase/2-dehydro-3-deoxyphosphogluconate aldolase  | 0.06                    | 0.5595  | 0.8694 | -1.10                   | 0.0003  | 0.0142 |
| CCNA_01179 | 3'-phosphoadenosine 5'-phosphosulfate sulfotransferase CysH                   | -0.08                   | 0.6128  | 0.8957 | -1.12                   | 0.0028  | 0.0380 |
| CCNA_02741 | conserved hypothetical protein                                                | -0.13                   | 0.6809  | 0.9288 | -1.45                   | 0       | 0.0088 |
| CCNA_01960 | acetyl-CoA carboxylase biotin carboxyl carrier protein subunit                | -0.04                   | 0.7571  | 0.9519 | -1.94                   | 0.0004  | 0.0156 |
| CCNA_00545 | acetoacetyl-CoA reductase                                                     | 0.05                    | 0.8240  | 0.9722 | -1.32                   | 0.0004  | 0.0156 |
| CCNA_01747 | 3-oxoacyl-(acyl-carrier protein) reductase                                    | 0.02                    | 0.8455  | 0.9775 | -1.17                   | 0.0002  | 0.0134 |
| CCNA_01991 | OmpH-like outer membrane protein                                              | 0.05                    | 0.8580  | 0.9800 | -1.22                   | 0.0002  | 0.0134 |
| CCNA_03584 | histidine phosphotransferase ChpT                                             | 0.02                    | 0.8796  | 0.9871 | -1.40                   | 0.0003  | 0.0146 |
| CCNA_02293 | thiol:disulfide interchange protein TlpA                                      | 0.02                    | 0.9070  | 0.9926 | -1.05                   | 0.0005  | 0.0156 |

759  
760  
761

<sup>a</sup>Wald's Test

<sup>b</sup>Student's t-test

762 **TABLE 2** Proteins with significant differences in steady-state levels between *gsrN<sup>++</sup>* and wild type (*gsrN<sup>++</sup>* / WT)  
 763 during hyperosmotic stress, with associated transcript changes.

| gene name  | annotated function                 | RNA-Seq <sup>a</sup>           |                  |         | LC-MS/MS <sup>b</sup>          |                 |         |
|------------|------------------------------------|--------------------------------|------------------|---------|--------------------------------|-----------------|---------|
|            |                                    | <i>log</i> <sub>2</sub> (Fold) | <i>p</i> -value* | FDR*    | <i>log</i> <sub>2</sub> (Fold) | <i>p</i> -value | FDR     |
| CCNA_03839 | acylamino-acid-releasing enzyme    | -2.46                          | 0                | 0       | -2.03                          | 0.00027         | 0.01505 |
| CCNA_00601 | MoxR-like ATPase                   | -2.34                          | 0                | 0       | -1.28                          | 0.00058         | 0.02198 |
| CCNA_02174 | multidrug resistance efflux pump   | -1.55                          | 0                | 0       | -1.10                          | 0.00236         | 0.03647 |
| CCNA_02540 | N-acyl-L-amino acid amidohydrolase | -0.98                          | 0                | 0       | -1.16                          | 0.00057         | 0.02198 |
| CCNA_00214 | TonB-dependent receptor            | 0.74                           | 6.6e-07          | 8.5E-06 | -1.74                          | 0.00184         | 0.03167 |
| CCNA_03023 | TonB-dependent receptor            | 0.88                           | 4.38E-09         | 7.5E-08 | -1.13                          | 0.00250         | 0.03648 |
| CCNA_03157 | conserved hypothetical protein     | 0.96                           | 1.22E-09         | 2.4E-08 | -1.05                          | 0.00421         | 0.04462 |
| CCNA_03695 | aldehyde dehydrogenase             | 1.17                           | 0                | 0       | 1.13                           | 0.00465         | 0.04462 |
| CCNA_00028 | TonB-dependent receptor            | 1.23                           | 1.8E-13          | 4.9E-12 | -1.97                          | 0.00066         | 0.02198 |

764 <sup>a</sup>Wald's Test

765 <sup>b</sup>Student's t-test

766 \* *p* values and FDR value of zero are < 1e-17

767

768 **Table 3.** RNA-seq analysis of  $\Delta sigT$  and  $gsrN^{++}$  during hyperosmotic stress.

| gene name                 | annotated function                                  | $gsrN^{++}/WT$  |                         |                  | $\Delta sigT/WT$ |                         |                  |
|---------------------------|-----------------------------------------------------|-----------------|-------------------------|------------------|------------------|-------------------------|------------------|
|                           |                                                     | $\log_2$ (Fold) | $p$ -value <sup>1</sup> | FDR <sup>1</sup> | $\log_2$ (Fold)  | $p$ -value <sup>1</sup> | FDR <sup>1</sup> |
| <i>gsrN</i>               | cell cycle regulated sRNA <i>gsrN</i>               | 3.14            | 0                       | 0                | -6.27            | 7.98E-14                | 3.33E-12         |
| <i>CCNA_00882</i>         | hypothetical protein                                | 2.75            | 0                       | 0                | -5.82            | 0                       | 0                |
| <i>CCNA_03694</i>         | AcoR-family transcriptional regulator               | 1.37            | 0                       | 0                | -1.64            | 0                       | 0                |
| <b><i>CCNA_00028</i>*</b> | TonB-dependent receptor                             | 1.23            | 1.82E-13                | 4.90E-12         | -1.32            | 2.85E-14                | 1.27E-12         |
| <b><i>CCNA_03695</i>*</b> | aldehyde dehydrogenase                              | 1.17            | 0                       | 0                | -1.40            | 1.10E-05                | 1.52E-04         |
| <i>CCNA_03889</i>         | conserved hypothetical protein                      | 1.10            | 1.55E-04                | 1.25E-03         | -1.30            | 1.92E-12                | 7.13E-11         |
| <i>CCNA_00709</i>         | hypothetical protein                                | 1.07            | 5.67E-04                | 3.89E-03         | -6.22            | 3.90E-06                | 5.97E-05         |
| <i>CCNA_01089</i>         | conserved hypothetical protein                      | -1.00           | 1.11E-16                | 4.12E-15         | 1.18             | 5.44E-13                | 2.10E-11         |
| <i>CCNA_02051</i>         | imidazolonepropionase related amidohydrolase        | -1.22           | 0                       | 0                | 1.11             | 3.09E-09                | 7.70E-08         |
| <i>CCNA_01653</i>         | cyclophilin-type peptidylprolyl cis-trans isomerase | -1.23           | 0                       | 0                | 1.39             | 0                       | 0                |
| <i>CCNA_00243</i>         | hypothetical protein                                | -1.33           | 0                       | 0                | 1.25             | 3.13E-11                | 9.84E-10         |
| <i>CCNA_03082</i>         | hypothetical protein                                | -1.34           | 0                       | 0                | 1.24             | 2.82E-12                | 1.03E-10         |
| <i>CCNA_01100</i>         | acylamino-acid-releasing enzyme                     | -1.55           | 0                       | 0                | 1.16             | 9.52E-10                | 2.56E-08         |
| <b><i>CCNA_02174</i>*</b> | multidrug resistance efflux pump                    | -1.55           | 0                       | 0                | 2.32             | 0                       | 0                |
| <i>CCNA_02935</i>         | methyl-accepting chemotaxis protein                 | -1.66           | 0                       | 0                | 2.12             | 0                       | 0                |
| <i>CCNA_02172</i>         | ABC-type transporter, permease component            | -1.72           | 0                       | 0                | 2.37             | 0                       | 0                |
| <i>CCNA_02173</i>         | ABC transporter ATP-binding protein                 | -1.79           | 0                       | 0                | 2.29             | 0                       | 0                |
| <i>CCNA_01247</i>         | CESA-like glycosyltransferase                       | -2.00           | 0                       | 0                | -1.53            | 6.29E-10                | 1.72E-08         |
| <i>CCNA_02050</i>         | imidazolonepropionase related amidohydrolase        | -2.10           | 0                       | 0                | 1.29             | 2.91E-08                | 6.51E-07         |
| <i>CCNA_03687</i>         | carbonic anhydrase                                  | -2.24           | 0                       | 0                | 1.99             | 0                       | 0                |

769 \* Genes also identified in Fig. 3

770 <sup>1</sup> p values and FDR value of zero are < 1e-17

771 **References**

- 772
- 773 1. **Hoch JA, Silhavy TJ.** 1995. Two-Component Signal Transduction. ASM Press, Washington,  
774 D.C.
- 775 2. **Helmann JD.** 2002. The extracytoplasmic function (ECF) sigma factors. *Adv Microb Physiol*  
776 **46**:47-110.
- 777 3. **Paget MS.** 2015. Bacterial Sigma Factors and Anti-Sigma Factors: Structure, Function and  
778 Distribution. *Biomolecules* **5**:1245-1265.
- 779 4. **Bastiat B, Sauviac L, Bruand C.** 2010. Dual control of *Sinorhizobium meliloti* RpoE2 sigma  
780 factor activity by two PhyR-type two-component response regulators. *J Bacteriol* **192**:2255-  
781 2265.
- 782 5. **Francez-Charlot A, Frunzke J, Reichen C, Ebnetter JZ, Gourion B, Vorholt JA.** 2009.  
783 Sigma factor mimicry involved in regulation of general stress response. *Proc Natl Acad Sci U*  
784 *S A* **106**:3467-3472.
- 785 6. **Herrou J, Foreman R, Fiebig A, Crosson S.** 2010. A structural model of anti-anti-sigma  
786 inhibition by a two-component receiver domain: the PhyR stress response regulator. *Mol*  
787 *Microbiol* **78**:290-304.
- 788 7. **Lourenco RF, Kohler C, Gomes SL.** 2011. A two-component system, an anti-sigma factor  
789 and two paralogous ECF sigma factors are involved in the control of general stress response  
790 in *Caulobacter crescentus*. *Mol Microbiol* **80**:1598-1612.
- 791 8. **Fiebig A, Herrou J, Willett J, Crosson S.** 2015. General Stress Signaling in the  
792 Alphaproteobacteria. *Annu Rev Genet* **49**:603-625.
- 793 9. **Francez-Charlot A, Kaczmarczyk A, Fischer HM, Vorholt JA.** 2015. The general stress  
794 response in Alphaproteobacteria. *Trends Microbiol* **23**:164-171.
- 795 10. **Tien MZ.** 2017. Iterative Rank, GitHub, <https://github.com/mtien/IterativeRank>.
- 796 11. **Tien M, Fiebig A, Crosson S.** 2018. Gene network analysis identifies a central post-  
797 transcriptional regulator of cellular stress survival. *Elife* **7**:e33684.
- 798 12. **Andersen J, Forst SA, Zhao K, Inouye M, Delihis N.** 1989. The function of micF RNA. micF  
799 RNA is a major factor in the thermal regulation of OmpF protein in *Escherichia coli*. *J Biol*  
800 *Chem* **264**:17961-17970.
- 801 13. **Bojanovic K, D'Arrigo I, Long KS.** 2017. Global Transcriptional Responses to Osmotic,  
802 Oxidative, and Imipenem Stress Conditions in *Pseudomonas putida*. *Appl Environ Microbiol*  
803 **83**:e03236-03216.
- 804 14. **Gomez-Lozano M, Marvig RL, Tulstrup MV, Molin S.** 2014. Expression of antisense small  
805 RNAs in response to stress in *Pseudomonas aeruginosa*. *BMC Genomics* **15**:783.
- 806 15. **Majdalani N, Chen S, Murrow J, St John K, Gottesman S.** 2001. Regulation of RpoS by a  
807 novel small RNA: the characterization of RprA. *Mol Microbiol* **39**:1382-1394.
- 808 16. **Guillier M, Gottesman S.** 2006. Remodelling of the *Escherichia coli* outer membrane by two  
809 small regulatory RNAs. *Mol Microbiol* **59**:231-247.
- 810 17. **Chen S, Zhang A, Blyn LB, Storz G.** 2004. MicC, a second small-RNA regulator of Omp  
811 protein expression in *Escherichia coli*. *J Bacteriol* **186**:6689-6697.
- 812 18. **Guillier M, Gottesman S.** 2008. The 5' end of two redundant sRNAs is involved in the  
813 regulation of multiple targets, including their own regulator. *Nucleic Acids Res* **36**:6781-6794.
- 814 19. **Kim S, Jeon TJ, Oberai A, Yang D, Schmidt JJ, Bowie JU.** 2005. Transmembrane glycine  
815 zippers: physiological and pathological roles in membrane proteins. *Proc Natl Acad Sci U S A*  
816 **102**:14278-14283.
- 817 20. **Foreman R, Fiebig A, Crosson S.** 2012. The LovK-LovR two-component system is a  
818 regulator of the general stress pathway in *Caulobacter crescentus*. *J Bacteriol* **194**:3038-3049.
- 819 21. **Alvarez-Martinez CE, Lourenco RF, Baldini RL, Laub MT, Gomes SL.** 2007. The ECF  
820 sigma factor sigma(T) is involved in osmotic and oxidative stress responses in *Caulobacter*  
821 *crescentus*. *Mol Microbiol* **66**:1240-1255.
- 822 22. **Altschul SF, Gish W, Miller W, Myers EW, Lipman DJ.** 1990. Basic local alignment search  
823 tool. *J Mol Biol* **215**:403-410.



- 824 23. **Nielsen H.** 2017. Predicting Secretory Proteins with SignalP. *Methods Mol Biol* **1611**:59-73.
- 825 24. **Mann M, Wright PR, Backofen R.** 2017. IntaRNA 2.0: enhanced and customizable prediction  
826 of RNA-RNA interactions. *Nucleic Acids Res* **45**:W435-W439.
- 827 25. **Zuker M.** 2003. Mfold web server for nucleic acid folding and hybridization prediction. *Nucleic*  
828 *Acids Res* **31**:3406-3415.
- 829 26. **Mathews DH, Turner DH, Zuker M.** 2007. RNA secondary structure prediction. *Curr Protoc*  
830 *Nucleic Acid Chem* **Chapter 11**:Unit 11 12.
- 831 27. **Kempf B, Bremer E.** 1998. Uptake and synthesis of compatible solutes as microbial stress  
832 responses to high-osmolality environments. *Arch Microbiol* **170**:319-330.
- 833 28. **Alon U.** 2007. Network motifs: theory and experimental approaches. *Nat Rev Genet* **8**:450-  
834 461.
- 835 29. **Beisel CL, Storz G.** 2011. The base-pairing RNA spot 42 participates in a multioutput  
836 feedforward loop to help enact catabolite repression in *Escherichia coli*. *Mol Cell* **41**:286-297.
- 837 30. **Papenfort K, Espinosa E, Casadesus J, Vogel J.** 2015. Small RNA-based feedforward loop  
838 with AND-gate logic regulates extrachromosomal DNA transfer in *Salmonella*. *Proc Natl Acad*  
839 *Sci U S A* **112**:E4772-4781.
- 840 31. **Plumbridge J, Bossi L, Oberto J, Wade JT, Figueroa-Bossi N.** 2014. Interplay of  
841 transcriptional and small RNA-dependent control mechanisms regulates chitosugar uptake in  
842 *Escherichia coli* and *Salmonella*. *Mol Microbiol* **92**:648-658.
- 843 32. **Majdalani N, Gottesman S.** 2005. The Rcs phosphorelay: a complex signal transduction  
844 system. *Annu Rev Microbiol* **59**:379-405.
- 845 33. **Cover TL, Blanke SR.** 2005. *Helicobacter pylori* VacA, a paradigm for toxin multifunctionality.  
846 *Nat Rev Microbiol* **3**:320-332.
- 847 34. **Price MN, Wetmore KM, Waters RJ, Callaghan M, Ray J, Liu H, Kuehl JV, Melnyk RA,**  
848 **Lamson JS, Suh Y, Carlson HK, Esquivel Z, Sadeeshkumar H, Chakraborty R, Zane GM,**  
849 **Rubin BE, Wall JD, Visel A, Bristow J, Blow MJ, Arkin AP, Deutschbauer AM.** 2018.  
850 Mutant phenotypes for thousands of bacterial genes of unknown function. *Nature* **557**:503-509.
- 851 35. **Biondi EG, Reisinger SJ, Skerker JM, Arif M, Perchuk BS, Ryan KR, Laub MT.** 2006.  
852 Regulation of the bacterial cell cycle by an integrated genetic circuit. *Nature* **444**:899-904.
- 853 36. **Britos L, Abeliuk E, Taverner T, Lipton M, McAdams H, Shapiro L.** 2011. Regulatory  
854 response to carbon starvation in *Caulobacter crescentus*. *PLoS One* **6**:e18179.
- 855 37. **Gogol EB, Rhodius VA, Papenfort K, Vogel J, Gross CA.** 2011. Small RNAs endow a  
856 transcriptional activator with essential repressor functions for single-tier control of a global  
857 stress regulon. *Proc Natl Acad Sci U S A* **108**:12875-12880.
- 858 38. **Poindexter JS.** 1964. Biological Properties and Classification of the *Caulobacter* Group.  
859 *Bacteriol Rev* **28**:231-295.
- 860 39. **Ely B.** 1991. Genetics of *Caulobacter crescentus*. *Methods Enzymol* **204**:372-384.
- 861 40. **Finan TM, Kunkel B, De Vos GF, Signer ER.** 1986. Second symbiotic megaplasmid in  
862 *Rhizobium meliloti* carrying exopolysaccharide and thiamine synthesis genes. *J Bacteriol*  
863 **167**:66-72.
- 864 41. **Thanbichler M, Iniesta AA, Shapiro L.** 2007. A comprehensive set of plasmids for vanillate-  
865 and xylose-inducible gene expression in *Caulobacter crescentus*. *Nucleic Acids Res* **35**:e137.
- 866 42. **Ried JL, Collmer A.** 1987. An nptI-sacB-sacR cartridge for constructing directed, unmarked  
867 mutations in gram-negative bacteria by marker exchange- eviction mutagenesis. *Gene* **57**:239-  
868 246.
- 869 43. **West L, Yang D, Stephens C.** 2002. Use of the *Caulobacter crescentus* genome sequence to  
870 develop a method for systematic genetic mapping. *J Bacteriol* **184**:2155-2166.
- 871 44. **Santos PM, Di Bartolo I, Blatny JM, Zennaro E, Valla S.** 2001. New broad-host-range  
872 promoter probe vectors based on the plasmid RK2 replicon. *FEMS Microbiol Lett* **195**:91-96.
- 873 45. **Marks ME, Castro-Rojas CM, Teiling C, Du L, Kapatral V, Walunas TL, Crosson S.** 2010.  
874 The genetic basis of laboratory adaptation in *Caulobacter crescentus*. *J Bacteriol* **192**:3678-  
875 3688.

- 876 46. **Truman AW, Kristjansdottir K, Wolfgeher D, Hasin N, Polier S, Zhang H, Perrett S,**  
877 **Prodromou C, Jones GW, Kron SJ.** 2012. CDK-dependent Hsp70 Phosphorylation controls  
878 G1 cyclin abundance and cell-cycle progression. *Cell* **151**:1308-1318.
- 879 47. **Cox J, Hein MY, Luber CA, Paron I, Nagaraj N, Mann M.** 2014. Accurate proteome-wide  
880 label-free quantification by delayed normalization and maximal peptide ratio extraction, termed  
881 MaxLFQ. *Mol Cell Proteomics* **13**:2513-2526.
- 882 48. **Dam P, Olman V, Harris K, Su Z, Xu Y.** 2007. Operon prediction using both genome-specific  
883 and general genomic information. *Nucleic Acids Res* **35**:288-298.
- 884 49. **Mao F, Dam P, Chou J, Olman V, Xu Y.** 2009. DOOR: a database for prokaryotic operons.  
885 *Nucleic Acids Res* **37**:D459-463.  
886
